# Supplementary material for: Functionally distinct groups of inherited PTEN mutations in autism and tumour syndromes
Source: PubMed Central journal article supplement (PMC4316932; doi:10.1136/jmedgenet-2014-102803), 2014-12-19
Supplement: jmedgenet-2014-102803-s1.pdf [file jmedgenet-2014-102803-s1.pdf]

# **Functionally distinct groups of inherited PTEN mutations in autism and tumour syndromes**

**Laura Spinelli, Fiona M. Black, Jonathan N. Berg, Britta J. Eickholt and  
Nicholas R. Leslie**

Figure S1

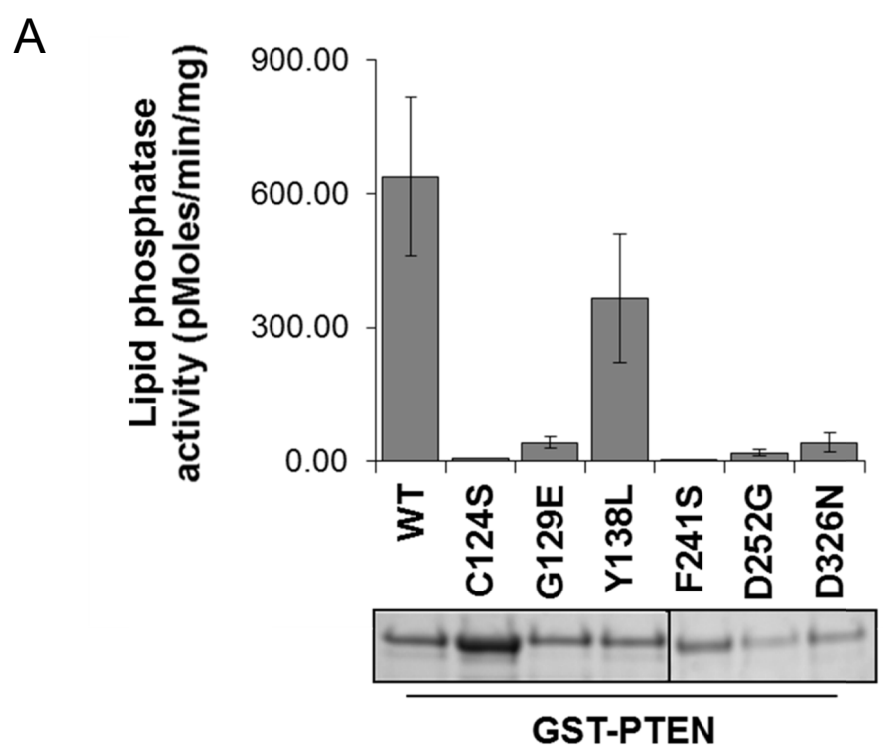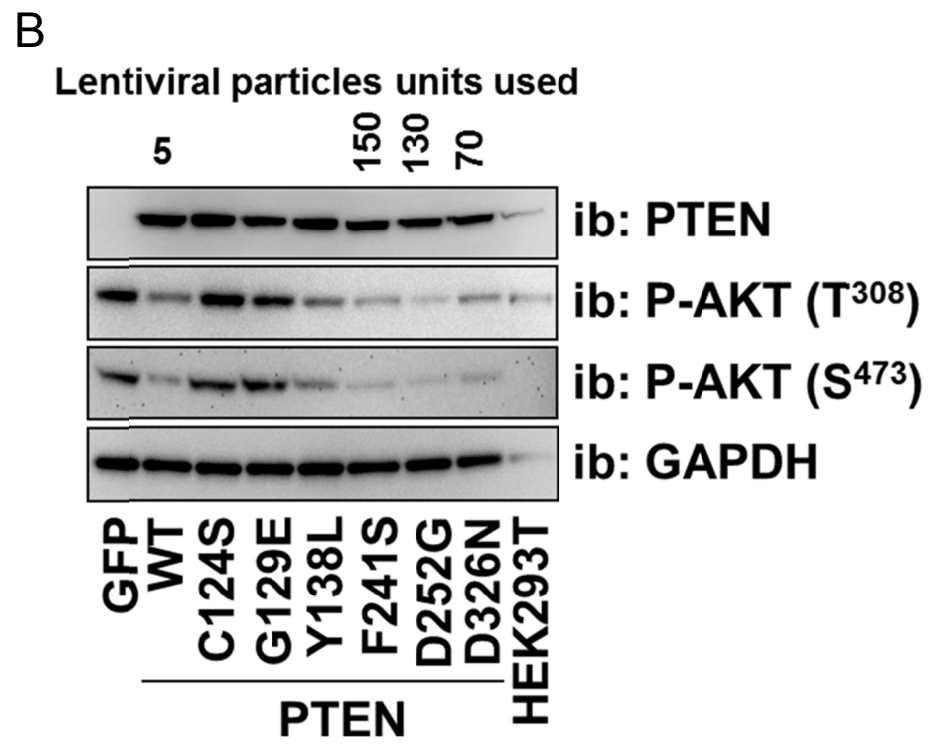

### **Figure S1. PTEN mutants characterisation in bacteria and U87MG cells**

Autism-related mutations proteins drastically reduce PTEN phosphatase activity when expressed in bacteria but they are able to regulate AKT when expressed in U87MG cells. PTEN WT and PTEN mutants (C124S, G129E, Y138L, F241S, D252G and D326N) were expressed in bacteria and purified as GST-fusion proteins. (A) The proteins were separated by SDS-PAGE and stained with Coomassie Brilliant Blue R-250. Proteins were assayed against  $^{33}\text{P}$  radiolabelled  $\text{PIP}_3$  for 1 hour at  $37^\circ\text{C}$ . The activity is presented as the mean activity  $\pm$  s.e.m from three experiments performed in duplicates. (B) PTEN null U87MG cells were transduced for 48 hours with lentiviruses encoding GFP, PTEN WT or C124S, G129E, Y138L, F241S, D252G and D326N. PTEN expression and AKT phosphorylation were investigated by western blotting of total cell lysates using total and phospho-specific antibodies. Units of lentiviruses particles used to express PTEN are indicated (5 units are equal to  $50\ \mu\text{l}$  of viral supernatant).

Figure S2

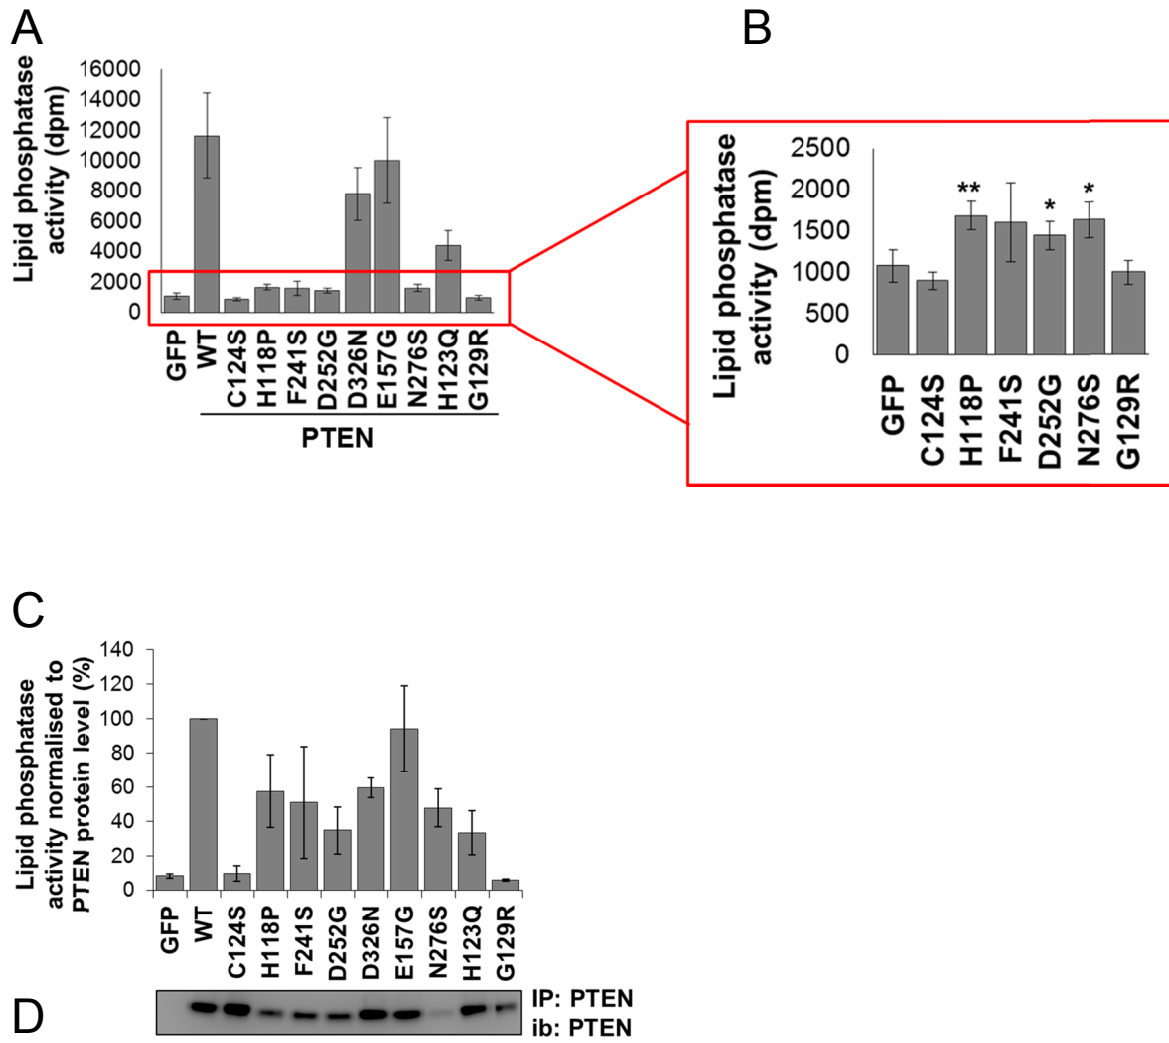

## Figure S2. Raw data from the PTEN lipid phosphatase activity assay

PTEN proteins or GFP were transiently over-expressed in U87MG cells and after cell lysis, immunoprecipitated using an antibody raised against the N-terminus of PTEN. Immune complexes were assayed against radiolabelled PIP<sub>3</sub> vesicles. (A) Mean raw phosphatase activity in dpm released phosphate is shown, derived from six experiments performed on different days,  $\pm$  s.e.m.

(B) This shows the same mean raw phosphatase activity data as (A) rescaled to show the differences between raw values with low recovered activity. Across the six experiments there was no overlap between the released phosphate values for any of the seven mutants and the data obtained using the inactive PTEN C124S control. Accordingly, for six of the seven mutants the measured released phosphate was significantly higher than detected with this inactive control (the exception being F241S). (\*\* $p < 0.01$ , \* $p < 0.05$  compared to PTEN C124S; Student's *t*-test using Excel and GraphPad Prism software). (C) This shows the mean activity from six independent experiments  $\pm$  s.e.m as a % of wild-type PTEN activity after normalisation to the amount of protein immunoprecipitated. Immunoprecipitated protein was determined by densitometry (ImageQuant TL software) after immunoblotting and direct chemiluminescence detection using CCD camera. (D) A representative immunoblot of the immunoprecipitated proteins from one of the experiments.

Figure S3

A

All germline PTEN mutations

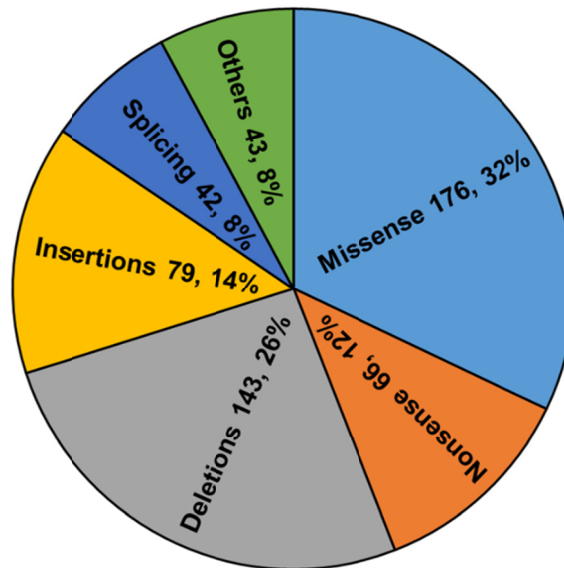

B

ASD-associated PTEN mutations

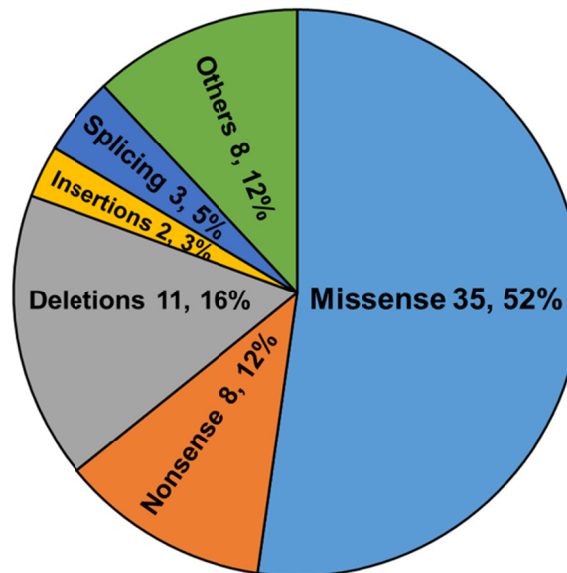

**Figure S3. Classification of all inherited PTEN mutations (A) and selectively those associated with ASD (B).** The germline PTEN mutations detailed in Tables S1, S3 and S4 were classified into the categories shown. (A) displays the number of apparently independent patients carrying PTEN mutations and (B) the classification of PTEN mutations in independent patients described with ASD, either in the presence or absence of other symptoms including PHTS. A significantly larger fraction of ASD associated mutations are missense mutations 35/67 and 176/549 ( $p < 0.005$ , Fishers Exact Test)

Figure S4

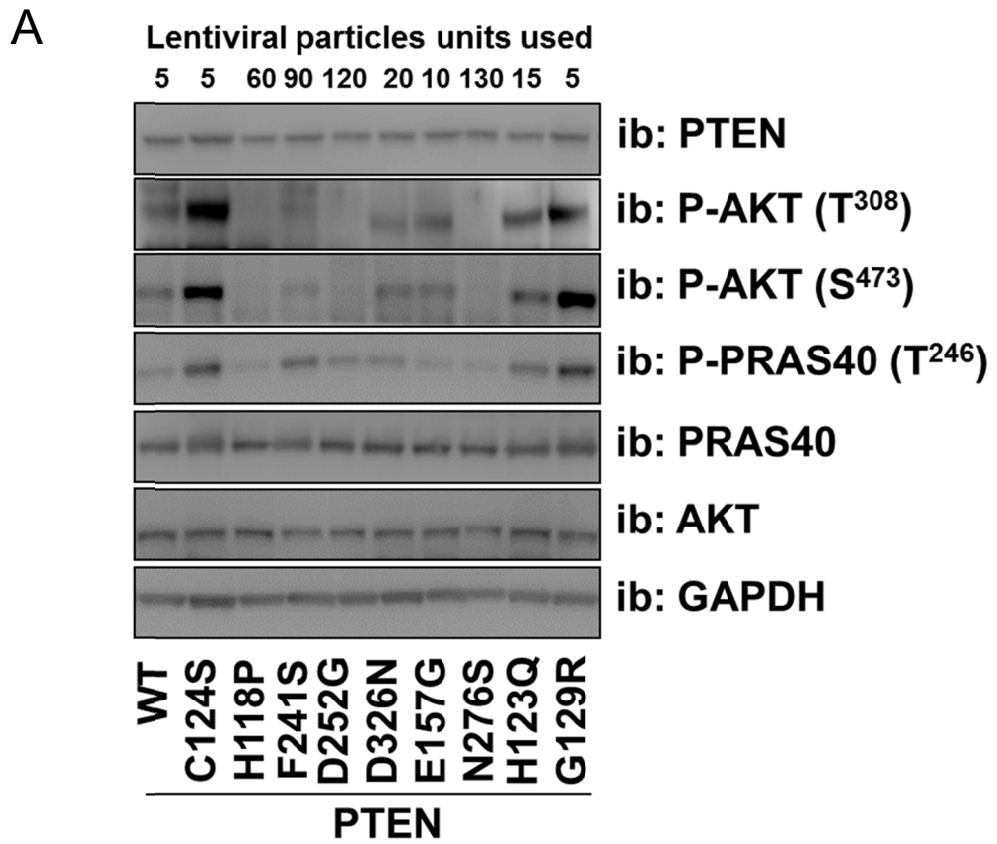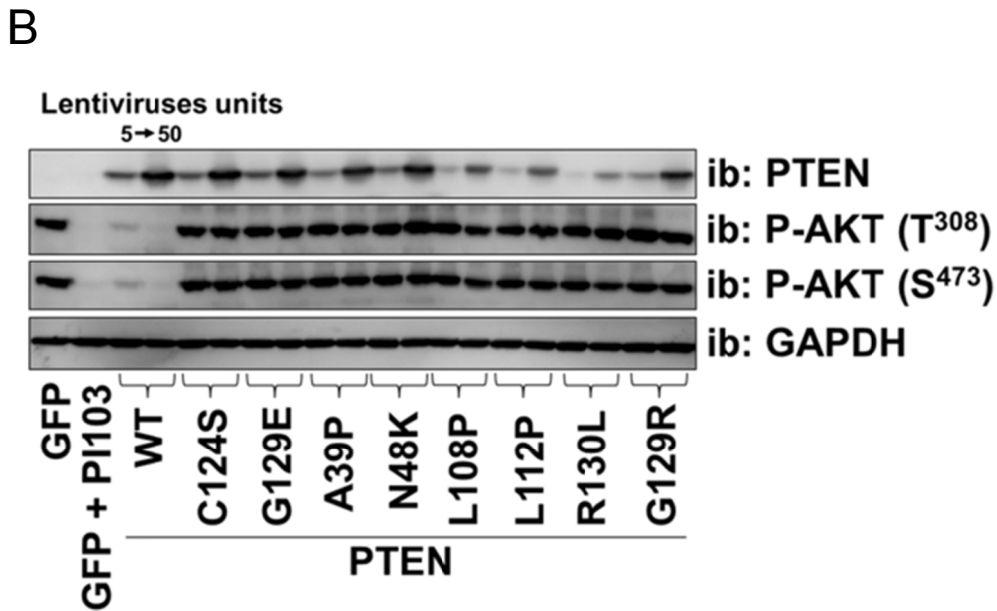

**Figure S4. Regulation of AKT and downstream pathways by autism- and Cowden-related mutant proteins in U87MG cells**

PTEN null U87MG cells were transduced for 48 hours with lentiviruses encoding PTEN WT or mutants using (A) different amount of lentiviral particles, as shown, for each mutant in order to obtain the same PTEN expression level or (B) two concentrations (low and high) of lentiviruses particles (5 units are equal to 50  $\mu$ l of viral supernatant). Cell expressing GFP and cells treated with the PI3K inhibitor PI103 (1  $\mu$ M for 30 minutes) were used as control. The evaluation of PTEN and phosphorylated and total AKT and PRAS40 in the lysates from transduced cells was carried out by western blotting using total and phospho-specific antibodies. The blotting panels shown are representative of three independent experiments.



**Table S1. PTEN mutations associated with ASD**

| <b>Missense</b>              | <b>Nonsense</b>    | <b>Deletions</b>    | <b>Insertions</b> | <b>Splicing</b> | <b>Others</b> | <b>References</b>    |
|------------------------------|--------------------|---------------------|-------------------|-----------------|---------------|----------------------|
| <b>c.278A&gt;G<br/>H93R</b>  |                    |                     |                   |                 |               | Butler et al., 2005  |
| <b>c.722T&gt;C<br/>F241S</b> |                    |                     |                   |                 |               | Butler et al., 2005  |
| <b>c.755A&gt;G<br/>D252G</b> |                    |                     |                   |                 |               | Butler et al., 2005  |
| <b>c.66C&gt;G<br/>D22E</b>   |                    |                     |                   |                 |               | Buxbaum et al., 2007 |
|                              |                    |                     |                   |                 | c._1088C>T    | Buxbaum et al., 2007 |
|                              |                    |                     |                   |                 | c._1084C>T    | Buxbaum et al., 2007 |
|                              |                    |                     |                   |                 | c. IVS3-9T>C  | Buxbaum et al., 2007 |
| <b>c.976G&gt;A<br/>D326N</b> |                    |                     |                   |                 |               | Buxbaum et al., 2007 |
|                              |                    |                     |                   |                 | c._1026C>A    | Buxbaum et al., 2007 |
|                              |                    |                     |                   |                 | c._903G>A     | Buxbaum et al., 2007 |
| <b>c.353A&gt;C<br/>H118P</b> |                    |                     |                   |                 |               | Orrico et al., 2009  |
| <b>c.530T&gt;G<br/>Y176C</b> |                    |                     |                   |                 |               | Orrico et al., 2009  |
| <b>c.824A&gt;G<br/>N276S</b> |                    |                     |                   |                 |               | Orrico et al., 2009  |
|                              |                    |                     | c.519-520insT     |                 |               | Varga et al., 2009   |
|                              | c.388C>T<br>R130*  |                     |                   |                 |               | Varga et al., 2009   |
|                              | c.416T>A<br>L139*  |                     |                   |                 |               | Varga et al., 2009   |
| <b>c.470A&gt;G<br/>E157G</b> |                    |                     |                   |                 |               | Varga et al., 2009   |
| <b>c.369C&gt;G<br/>H123Q</b> |                    |                     |                   |                 |               | McBride et al., 2010 |
| <b>c.518G&gt;A<br/>R173H</b> |                    |                     |                   |                 |               | McBride et al., 2010 |
| <b>c.232A&gt;G<br/>T78A</b>  |                    |                     |                   |                 |               | Schaaf et al., 2011  |
| <b>c.75G&gt;T<br/>L25F</b>   |                    |                     |                   |                 |               | Mester et al., 2012  |
|                              | c.1003C>T<br>R335* |                     |                   |                 |               | Mester et al., 2012  |
|                              |                    | Whole gene deletion |                   |                 |               | Mester et al., 2012  |
|                              |                    |                     | c.420-421insA     |                 |               | Mester et al., 2012  |
| <b>c.392C&gt;T<br/>T131I</b> |                    |                     |                   |                 |               | O'Roak et al., 2012  |
| <b>c.500C&gt;A<br/>T167N</b> |                    |                     |                   |                 |               | O'Roak et al., 2012  |
|                              |                    | c.158-159delTA      |                   |                 |               | Bubien et al., 2013  |
|                              |                    | c.284delC           |                   |                 |               | Bubien et al., 2013  |

| Missense                     | Nonsense           | Deletions            | Insertions | Splicing   | Others        | References                |
|------------------------------|--------------------|----------------------|------------|------------|---------------|---------------------------|
|                              | c.388C>T<br>R130*  |                      |            |            |               | Bubien et al., 2013       |
|                              | c.388C>T<br>R130*  |                      |            |            |               | Bubien et al., 2013       |
| <b>c.392C&gt;T<br/>T131I</b> |                    |                      |            |            |               | Bubien et al., 2013       |
| <b>c.403A&gt;G<br/>I135V</b> |                    |                      |            |            |               | Bubien et al., 2013       |
| <b>c.406T&gt;C<br/>C136R</b> |                    |                      |            |            |               | Bubien et al., 2013       |
| <b>c.518G&gt;A<br/>R173H</b> |                    |                      |            |            |               | Bubien et al., 2013       |
|                              |                    | c.586delC            |            |            |               | Bubien et al., 2013       |
|                              |                    | c.586delC            |            |            |               | Bubien et al., 2013       |
|                              |                    | c.586delC            |            |            |               | Bubien et al., 2013       |
|                              |                    |                      |            | c.635-1G>C |               | Bubien et al., 2013       |
|                              |                    |                      |            | c.635-3C>G |               | Bubien et al., 2013       |
| <b>c.830C&gt;G<br/>T277R</b> |                    |                      |            |            |               | Bubien et al., 2013       |
|                              |                    | c.1004-<br>1005delGA |            |            |               | Bubien et al., 2013       |
| <b>c.202T&gt;A<br/>Y68N</b>  |                    |                      |            |            |               | Klein et al., 2013        |
| <b>c.113C&gt;A<br/>P38H</b>  |                    |                      |            |            |               | Klein et al., 2013        |
| <b>c.764T&gt;C<br/>V255A</b> |                    |                      |            |            |               | Klein et al., 2013        |
|                              | c.959T>G<br>L320*  |                      |            |            |               | Vanderver et al.,<br>2014 |
| <b>c.17A&gt;T<br/>L6I</b>    |                    |                      |            |            |               | Vanderver et al.,<br>2014 |
| <b>c.194A&gt;G<br/>Y65C</b>  |                    |                      |            |            |               | Vanderver et al.,<br>2014 |
| <b>c.511C&gt;G<br/>Q171E</b> |                    |                      |            |            |               | Vanderver et al.,<br>2014 |
|                              | c.388C>T<br>R130*  |                      |            |            |               | Vanderver et al.,<br>2014 |
| <b>c.737C&gt;T<br/>P246L</b> |                    |                      |            |            |               | Vanderver et al.,<br>2014 |
| <b>c.633C&gt;G<br/>C211W</b> |                    |                      |            |            |               | Vanderver et al.,<br>2014 |
|                              |                    | c.43delA             |            |            |               | Marchese et al.,<br>2014  |
| <b>c.208C&gt;G<br/>L70V</b>  |                    |                      |            |            |               | Hobert et al., 2014       |
|                              |                    |                      |            |            | c.3G>T<br>M1I | Hobert et al., 2014       |
|                              |                    |                      |            |            | c.3G>T<br>M1I | Hobert et al., 2014       |
|                              | c.1003C>T<br>R335* |                      |            |            |               | Hobert et al., 2014       |
|                              |                    |                      |            | c.209+5G>A |               | Hobert et al., 2014       |

| Missense          | Nonsense | Deletions        | Insertions | Splicing | Others     | References           |
|-------------------|----------|------------------|------------|----------|------------|----------------------|
| c.40C>G<br>R14G   |          |                  |            |          |            | Frazier et al., 2014 |
| c.755A>T<br>D252V |          |                  |            |          |            | Frazier et al., 2014 |
| c.202T>C<br>Y68H  |          |                  |            |          |            | Frazier et al., 2014 |
| c.37A>C<br>N12T   |          |                  |            |          |            | Frazier et al., 2014 |
| c.395G>A<br>G132D |          |                  |            |          |            | Frazier et al., 2014 |
| c.277C>T<br>H93Y  |          |                  |            |          |            | Frazier et al., 2014 |
|                   |          | c.597delGTT      |            |          |            | Frazier et al., 2014 |
|                   |          |                  |            |          | c._1177C>T | Frazier et al., 2014 |
|                   |          | 4-Mb<br>deletion |            |          |            | Frazier et al., 2014 |
|                   |          | 10q deletion     |            |          |            | Frazier et al., 2014 |

**Tables S2 and S3. Severity index scoring system.**

Based on the clinical description of the patients carrying PTEN germline mutations, the severity scores were created according to the number of sites affected as well as the presence of mental retardation/ development delay (MR/DD). The presence of macrocephaly was recorded but not included in the severity index score, as macrocephaly was seen in almost every subject, with the chance that it was not recorded in others. For each site affected by benign tumours or lesions it was assigned one point, two points for each site affected by malignant tumours, and one point for the presence of mental retardation. The severity index score is the sum of these numbers. Patients who scored one to three were classified as “mild”, four to five as “moderate” and six or above as “severe”.

The choice of mutations to analyse has been made based on the “index score average” resulting from the average of the scores of all patients carrying the same PTEN mutation. It should be noted that the characterised PTEN mutants associated with severe phenotypes (see figure 4) were selected at a mid-point of the progression of the project and that the data tabulated here contain very recently published information added since that time. Efforts have been made to minimise the chances of double counting but this cannot be excluded.

Table S2

| <b>Severity index scoring system</b> |                                                             |                                                          |                                                                                                       |
|--------------------------------------|-------------------------------------------------------------|----------------------------------------------------------|-------------------------------------------------------------------------------------------------------|
| <b>Site affected</b>                 | <b>Benign lesion/tumour</b>                                 | <b>Malignant tumour/cancer</b>                           | <b>MR/DD</b>                                                                                          |
| <b>CNS</b>                           | <b>1 point</b><br>assigned for<br>each site<br>affected     | <b>2 points</b><br>assigned for<br>each site<br>affected | <b>1 point</b><br>assigned for<br>the presence of<br>Mental<br>Retardation/<br>Developmental<br>Delay |
| <b>Thyroid</b>                       |                                                             |                                                          |                                                                                                       |
| <b>Breast</b>                        |                                                             |                                                          |                                                                                                       |
| <b>Skin/Mucosa</b>                   |                                                             |                                                          |                                                                                                       |
| <b>Gastrointestinal tract</b>        |                                                             |                                                          |                                                                                                       |
| <b>Others</b>                        |                                                             |                                                          |                                                                                                       |
| <b>Total score</b>                   | <b>1-3 MILD</b><br><b>4-5 MODERATE</b><br><b>6 + SEVERE</b> |                                                          |                                                                                                       |

Table S3

| Mutations | Index score average | Index score patients | Assigned Phenotype | References                  |
|-----------|---------------------|----------------------|--------------------|-----------------------------|
| M1I       | 1                   | 1                    | ASD                | [1] Hobert et al., 2014     |
|           |                     | 1                    | ASD                | [1] Hobert et al., 2014     |
| K6I       | 1                   | 1                    | ASD                | [2] Vanderver et al., 2014  |
| K6E       | 1                   | 1                    | ASD                | [2] Vanderver et al., 2014  |
| K13E      | 3                   | 4                    | CS                 | [3] Bubien et al., 2013     |
|           |                     | 4                    | CS                 | [3] Bubien et al., 2013     |
|           |                     | 1                    | CS                 | [3] Bubien et al., 2013     |
| R14G      | 0                   | 0                    | ASD                | [4] Frazier et al., 2014    |
| R15S      | 3                   | 3                    | CS                 | [5] Nagy et al., 2011       |
| Y16H      | 4                   | 4                    | CS                 | [6] Ngeow et al., 2014      |
| D22E      | 0                   | 0                    | ASD                | [7] Buxbaum et al., 2007    |
| D24Y      | 5                   | 2                    | BRRS               | [8] Celebi et al., 1999     |
|           |                     | 8                    | CS                 | [3] Bubien et al., 2013     |
| D24G      | 4                   | 4                    | CS                 | [6] Ngeow et al., 2014      |
| D24H      | 6                   | 6                    | CS                 | [6] Ngeow et al., 2014      |
| D24V      | 5                   | 5                    | CS                 | [6] Ngeow et al., 2014      |
| L25F      | 0                   | 0                    | ASD                | [9] Mester et al., 2012     |
| T26P      | 2                   | 2                    | Unknown            | [9] Mester et al., 2012     |
| Y27N      | 4                   | 4                    | CS                 | [6] Ngeow et al., 2014      |
| Y27C      | 1                   | 1                    | Unknown            | [2] Vanderver et al., 2014  |
| P30L      | 1                   | 1                    | CS                 | [3] Bubien et al., 2013     |
| A34D      | 2                   | 2                    | BRRS               | [10] Marsh et al., 1999     |
|           |                     | 2                    | BRRS               | [10] Marsh et al., 1999     |
| M35R      | 1                   | 1                    | JPC                | [11] Olschwang et al., 1998 |
| M35T      | 4                   | 4                    | PLS                | [12] Zhou et al., 2001      |
| G36R      | 5                   | 5                    | CS                 | [13] Celebi et al., 2000    |
| P38H      | 1                   | 1                    | ASD                | [14] Klein et al., 2013     |
| A39P      | 7                   | 7                    | CS                 | [15] Tate et al., 2008      |
| G44D      | 2                   | 2                    | Unknown            | [16] Varga et al., 2009     |
| N48K      | 8                   | 8                    | CS                 | [17] Vega et al., 2003      |
| I50T      | 1                   | 1                    | Unknown            | [2] Vanderver et al., 2014  |
| H61D      | 0                   | 0                    | VATER              | [18] Reardon et al., 2001   |
| H61R      | 4                   | 4                    | CS                 | [6] Ngeow et al., 2014      |
| Y65C      | 0                   | 0                    | ASD                | [2] Vanderver et al., 2014  |
|           |                     | 0                    | ASD                | [2] Vanderver et al., 2014  |
| I67R      | 7                   | 7                    | CS                 | [3] Bubien et al., 2013     |
| Y68N      | 2                   | 2                    | ASD                | [14] Klein et al., 2013     |
| Y68D      | 0.5                 | 1                    | PS                 | [19] Loffeld et al., 2006   |
|           |                     | 0                    | CS                 | [19] Loffeld et al., 2006   |
| Y68H      | 1.33                | 1                    | BRRS               | [20] Marsh et al., 1998     |
|           |                     | 3                    | CS                 | [20] Marsh et al., 1998     |
|           |                     | 0                    | ASD                | [4] Frazier et al., 2014    |
| Y68C      | 2                   | 2                    | CS                 | [21] Lobo et al., 2009      |
| L70P      | 2                   | 2                    | CS                 | [20] Marsh et al., 1998     |
| L70V      | 3                   | 3                    | ASD                | [1] Hobert et al., 2014     |
| T78A      | 0                   | 0                    | ASD                | [22] Schaaf et al., 2011    |
| A79T      | 3                   | 3                    | BC                 | [23] Figer et al., 2002     |
| N82T      | 3                   | 3                    | BC                 | [23] Figer et al., 2002     |
| Y88C      | 1                   | 1                    | PHTS               | [9] Mester et al., 2012     |
| D92A      | 5                   | 5                    | CS                 | [3] Bubien et al., 2013     |
| H93Y      | 2.66                | 4                    | CS                 | [24] Kohno et al., 1998     |
|           |                     | 4                    | CS                 | [6] Ngeow et al., 2014      |
|           |                     | 0                    | ASD                | [4] Frazier et al., 2014    |

| Mutations | Index score average | Index score patients | Assigned Phenotype | References                  |
|-----------|---------------------|----------------------|--------------------|-----------------------------|
| H93R      | 1                   | 1                    | ASD                | [25] Butler et al., 2005    |
| P96Q      | 2.5                 | 3                    | CS                 | [26] Bussaglia et al., 2002 |
|           |                     | 2                    | CS                 | [26] Bussaglia et al., 2002 |
| P96R      | 3.5                 | 3                    | CS                 | [9] Mester et al., 2012     |
|           |                     | 4                    | CS                 | [27] Busch et al., 2013     |
| C105Y     | 2                   | 2                    | BRRS               | [10] Marsh et al., 1999     |
| D107G     | 1                   | 1                    | Unknown            | [2] Vanderver et al., 2014  |
| L108P     | 6.7                 | 6                    | PHTS               | [28] Tan et al., 2007       |
|           |                     | 7                    | PHTS               | [3] Bubien et al., 2013     |
|           |                     | 7                    | CS                 | [29] Ngeow et al., 2013     |
| L112P     | 11                  | 11                   | CS                 | [30] Tsou et al., 1998      |
| H118P     | 1                   | 1                    | ASD                | [31] Orrico et al., 2009    |
| V119I     | 4                   | 4                    | Multiple cancers   | [32] De Vivo et al., 2000   |
|           |                     | 4                    | Multiple cancers   | [32] De Vivo et al., 2000   |
| H123Q     | 2.5                 | 1                    | ASD                | [33] McBride et al., 2010   |
|           |                     | 4                    | CS                 | [34] Kerseboom et al., 2012 |
| H123R     | 4                   | 4                    | CS                 | [35] Nelen et al., 1997     |
| H123D     | 3                   | 3                    | CS                 | [26] Bussaglia et al., 2002 |
| C124R     | 4                   | 2                    | CS                 | [35] Nelen et al., 1997     |
|           |                     | 4                    | CS                 | [35] Nelen et al., 1997     |
|           |                     | 6                    | CS                 | [35] Nelen et al., 1997     |
| A126P     | 3                   | 3                    | CS                 | [9] Mester et al., 2012     |
| K128E     | 4                   | 4                    | CS                 | [27] Busch et al., 2013     |
| K128N     | 3                   | 3                    | CS                 | [29] Ngeow et al., 2013     |
| G129R     | 3.5                 | 5                    | CS                 | [36] Elia et al., 2012      |
|           |                     | 2                    | Unknown            | unpublished patient         |
| G129E     | 4                   | 4                    | CS                 | [37] Liaw et al., 1997      |
|           |                     | 5                    | CS                 | [37] Liaw et al., 1997      |
|           |                     | 7                    | CS                 | [37] Liaw et al., 1997      |
|           |                     | 2                    | CS                 | [37] Liaw et al., 1997      |
|           |                     | 2                    | CS                 | [29] Ngeow et al., 2013     |
| R130Q     | 3.9                 | 5                    | CS                 | [38] Kurose et al., 1999    |
|           |                     | 4                    | CS/BRRS            | [38] Kurose et al., 1999    |
|           |                     | 3                    | CS/BRRS            | [38] Kurose et al., 1999    |
|           |                     | 3                    | CS/BRRS            | [38] Kurose et al., 1999    |
|           |                     | 5                    | CS                 | [39] Heindl et al., 2012    |
|           |                     | 4                    | CS                 | [39] Heindl et al., 2012    |
|           |                     | 5                    | CS                 | [29] Ngeow et al., 2013     |
|           |                     | 4                    | CS                 | [6] Ngeow et al., 2014      |
|           |                     | 2                    | CS                 | [6] Ngeow et al., 2014      |
| R130G     | 1.8                 | 2                    | CS                 | [21] Lobo et al., 2009      |
|           |                     | 4                    | Unknown            | [9] Mester et al., 2012     |
|           |                     | 1                    | CS                 | [3] Bubien et al., 2013     |
|           |                     | 1                    | CS                 | [3] Bubien et al., 2013     |
|           |                     | 1                    | Unknown            | [3] Bubien et al., 2013     |
| R130L     | 5                   | 2                    | CS                 | [3] Bubien et al., 2013     |
|           |                     | 3                    | CS                 | [3] Bubien et al., 2013     |
|           |                     | 3                    | CS                 | [3] Bubien et al., 2013     |
|           |                     | 10                   | CS                 | [20] Marsh et al., 1998     |
| T131I     | 1.7                 | 4                    | CS                 | [6] Ngeow et al., 2014      |
|           |                     | 1                    | CS/ASD             | [3] Bubien et al., 2013     |
|           |                     | 3                    | Unknown            | [3] Bubien et al., 2013     |
| G132A     | 1                   | 1                    | ASD                | [40] O'Roak et al., 2012    |
|           |                     | 1                    | PHTS               | [28] Tan et al., 2007       |

| Mutations | Index score average | Index score patients | Assigned Phenotype | References                 |
|-----------|---------------------|----------------------|--------------------|----------------------------|
| G132D     | 3.16                | 2                    | CS                 | [41] Derrey et al., 2004   |
|           |                     | 6                    | CS                 | [3] Bubien et al., 2013    |
|           |                     | 4                    | CS                 | [3] Bubien et al., 2013    |
|           |                     | 3                    | CS                 | [3] Bubien et al., 2013    |
|           |                     | 4                    | CS                 | [39] Heindl et al., 2012   |
|           |                     | 0                    | ASD                | [4] Frazier et al., 2014   |
| G132V     | 3                   | 3                    | PHTS               | [42] Tekin et al., 2006    |
| M134R     | 0.75                | 0                    | BRRS               | [23] Figer et al., 2002    |
|           |                     | 0                    | BRRS               | [23] Figer et al., 2002    |
|           |                     | 0                    | BRRS               | [23] Figer et al., 2002    |
|           |                     | 3                    | Unknown            | [9] Mester et al., 2012    |
| M134I     | 0                   | 0                    | Unknown            | [43] Busa et al., 2013     |
|           |                     | 0                    | Unknown            | [43] Busa et al., 2013     |
|           |                     | 0                    | Unknown            | [43] Busa et al., 2013     |
|           |                     | 0                    | Unknown            | [43] Busa et al., 2013     |
| M134T     | 4.66                | 1                    | MR                 | [33] McBride et al., 2010  |
|           |                     | 5                    | CS                 | [29] Ngeow et al., 2013    |
|           |                     | 8                    | Unknown            | [27] Busch et al., 2013    |
| I135R     | 3                   | 3                    | BRRS               | [44] Boccone et al., 2006  |
| I135V     | 2.7                 | 1                    | BRRS               | [10] Marsh et al., 1999    |
|           |                     | 3                    | Unknown            | [3] Bubien et al., 2013    |
|           |                     | 2                    | Unknown            | [3] Bubien et al., 2013    |
|           |                     | 5                    | Unknown            | [3] Bubien et al., 2013    |
|           |                     | 3                    | Unknown            | [3] Bubien et al., 2013    |
|           |                     | 1                    | Unknown            | [3] Bubien et al., 2013    |
|           |                     | 4                    | CS                 | [3] Bubien et al., 2013    |
| C136R     | 5.6                 | 7                    | CS                 | [45] Kubo et al., 2000     |
|           |                     | 7                    | CS                 | [3] Bubien et al., 2013    |
|           |                     | 2                    | CS                 | [3] Bubien et al., 2013    |
|           |                     | 6                    | CS                 | [3] Bubien et al., 2013    |
|           |                     | 6                    | CS                 | [6] Ngeow et al., 2014     |
| R142P     | 3                   | 3                    | CS                 | [3] Bubien et al., 2013    |
| A151B     | 3                   | 3                    | CS                 | [3] Bubien et al., 2013    |
| Y155N     | 4                   | 4                    | CS                 | [3] Bubien et al., 2013    |
| Y155C     | 3.66                | 2                    | CS                 | [46] Gicquel et al., 2003  |
|           |                     | 7                    | CS                 | [3] Bubien et al., 2013    |
|           |                     | 2                    | CS                 | [29] Ngeow et al., 2013    |
| E157G     | 1                   | 1                    | ASD                | [16] Varga et al., 2009    |
| V158I     | 3                   | 4                    | Unknown            | [32] De Vivo et al., 2000  |
|           |                     | 2                    | Unknown            | [32] De Vivo et al., 2000  |
| D162E     | 1                   | 1                    | CS                 | [9] Mester et al., 2012    |
| G165E     | 5                   | 5                    | CS                 | [47] Nelen et al., 1999    |
| G165V     | 4                   | 4                    | CS                 | [20] Marsh et al., 1998    |
| G165R     | 2                   | 2                    | CS                 | [48] Banneau et al., 2010  |
| T167N     | 1                   | 1                    | ASD                | [40] O'Roak et al., 2012   |
| S170R     | 4                   | 2                    | BRRS               | [49] Marsh et al., 1997    |
|           |                     | 7                    | CS                 | [3] Bubien et al., 2013    |
|           |                     | 4                    | Unknown            | [3] Bubien et al., 2013    |
|           |                     | 3                    | CS                 | [3] Bubien et al., 2013    |
| S170I     | 4                   | 4                    | CS                 | [6] Ngeow et al., 2014     |
| Q171E     | 0                   | 0                    | ASD                | [2] Vanderver et al., 2014 |
| R173C     | 2.5                 | 1                    | BRRS               | [50] Lachlan et al., 2007  |
|           |                     | 4                    | CS                 | [6] Ngeow et al., 2014     |
| R173P     | 3.5                 | 3                    | LDD                | [51] Kirches et al., 2010  |
|           |                     | 4                    | Unknown            | [51] Kirches et al., 2010  |



| Mutations | Index score average | Index score patients | Assigned Phenotype | References                  |
|-----------|---------------------|----------------------|--------------------|-----------------------------|
| R173H     | 0.75                | 0                    | Unknown            | [50] Lachlan et al., 2007   |
|           |                     | 2                    | Unknown            | [50] Lachlan et al., 2007   |
|           |                     | 1                    | CS/ASD             | [3] Bubien et al., 2013     |
|           |                     | 0                    | ASD                | [33] McBride et al., 2010   |
| R173G     | 2                   | 2                    | CS                 | [6] Ngeow et al., 2014      |
| Y176C     | 1                   | 1                    | ASD                | [31] Orrico et al., 2009    |
| L181P     | 1                   | 1                    | CS                 | [52] Thiffault et al., 2004 |
| T202I     | 2                   | 2                    | Unknown            | [16] Varga et al., 2009     |
| C211W     | 1                   | 1                    | ASD                | [2] Vanderver et al., 2014  |
| V217D     | 2                   | 2                    | CS                 | [53] Kim et al., 2005       |
| R234Q     | 2                   | 2                    | Multiple cancers   | [54] Staal et al., 2002     |
| F241S     | 0                   | 0                    | ASD                | [25] Butler et al., 2005    |
| P246L     | 1                   | 2                    | BRRS               | [10] Marsh et al., 1999     |
|           |                     | 1                    | BRRS               | [9] Mester et al., 2012     |
|           |                     | 0                    | ASD                | [2] Vanderver et al., 2014  |
| D252G     | 1                   | 1                    | ASD                | [25] Butler et al., 2005    |
|           |                     | 1                    | CS                 | [3] Bubien et al., 2013     |
| D252V     | 0                   | 0                    | ASD                | [4] Frazier et al., 2014    |
| V255A     | 0                   | 0                    | ASD                | [14] Klein et al., 2013     |
| W274L     | 1                   | 1                    | DD                 | [33] McBride et al., 2010   |
| N276S     | 1                   | 1                    | ASD                | [31] Orrico et al., 2009    |
| T277R     | 1.66                | 1                    | CS                 | [3] Bubien et al., 2013     |
|           |                     | 2                    | CS                 | [3] Bubien et al., 2013     |
|           |                     | 2                    | CS                 | [3] Bubien et al., 2013     |
|           |                     | 3                    | CS                 | [3] Bubien et al., 2013     |
|           |                     | 0                    | CS/ASD             | [3] Bubien et al., 2013     |
|           |                     | 2                    | CS                 | [48] Banneau et al., 2010   |
| K289E     | 1                   | 1                    | CS                 | [55] Chi et al., 1998       |
| D326N     | 1                   | 1                    | AUTISM             | [7] Buxbaum et al., 2007    |
| R335L     | 4                   | 4                    | CS                 | [56] Sawada et al., 2000    |
| F337S     | 2                   | 2                    | CS                 | [50] Lachlan et al., 2007   |
| K342N     | 2                   | 3                    | HTS                | [3] Bubien et al., 2013     |
|           |                     | 1                    | CS                 | [3] Bubien et al., 2013     |
| V343E     | 3.5                 | 4                    | CS                 | [57] Lynch et al., 1997     |
|           |                     | 4                    | CS                 | [57] Lynch et al., 1997     |
|           |                     | 5                    | CS                 | [57] Lynch et al., 1997     |
|           |                     | 3                    | CS                 | [57] Lynch et al., 1997     |
|           |                     | 2                    | CS                 | [57] Lynch et al., 1997     |
|           |                     | 3                    | CS                 | [57] Lynch et al., 1997     |
| L345V     | 4.5                 | 4                    | CS                 | [6] Ngeow et al., 2014      |
|           |                     | 5                    | CS                 | [27] Busch et al., 2013     |

ASD, Autism spectrum disorder; BC, Breast cancer; BRRS, Bannayan-Riley-Ruvalcaba Syndrome; CS, Cowden Syndrome; DD, Developmental Delay; HTS, Hamartoma Tumour Syndrome; JPS, Juvenile Polyposis Coli; LDD, Lhermitte-Duclos disease; MR, Mental Retardation; PHTS, PTEN Hamartoma-Tumour Syndrome; PLS, Proteus-Like Syndrome; PS; Proteus Syndrome.

|             |                 |               |
|-------------|-----------------|---------------|
| <b>MILD</b> | <b>MODERATE</b> | <b>SEVERE</b> |
|-------------|-----------------|---------------|

**Table S4 Clinical features of the 204 patients carrying germline-derived PTEN missense mutations.**

| Mutation                      | M11                 | M11                 | K6I                    | K6E                    | N12T                 | K13E                | K13E                | K13E                | K13E                | R14G                 | R15S              |
|-------------------------------|---------------------|---------------------|------------------------|------------------------|----------------------|---------------------|---------------------|---------------------|---------------------|----------------------|-------------------|
| Diagnosis                     | ASD                 | ASD                 | ASD                    |                        | ASD                  | CS                  | CS                  | CS                  | CS                  | ASD                  | CS                |
| Sex                           | M                   | M                   | M                      | F                      | M                    |                     |                     |                     |                     | F                    |                   |
| Age                           | 11y                 | 12y                 | 3y                     | 11m                    | 5y2m                 |                     |                     |                     |                     | 3y3m                 |                   |
| <b>CNS</b>                    |                     |                     |                        |                        |                      |                     |                     |                     |                     |                      |                   |
| Macrocephaly                  | X                   | X                   | X                      | X                      | X                    | X                   | X                   | X                   | X                   | X                    | X                 |
| LDD                           |                     |                     |                        |                        |                      |                     |                     |                     |                     |                      |                   |
| Benign Tumour                 |                     |                     |                        |                        |                      |                     |                     |                     |                     |                      |                   |
| Malignant Tumour              |                     |                     |                        |                        |                      |                     |                     |                     |                     |                      |                   |
| MR/DD                         |                     |                     | X                      | X                      |                      |                     |                     |                     |                     |                      |                   |
| <b>THYROID</b>                |                     |                     |                        |                        |                      |                     |                     |                     |                     |                      |                   |
| Benign (adenoma, goitre)      |                     |                     |                        |                        |                      | X                   | X                   | X                   | X                   |                      | X                 |
| Malignant                     |                     |                     |                        |                        |                      |                     |                     |                     |                     |                      |                   |
| <b>BREASTS</b>                |                     |                     |                        |                        |                      |                     |                     |                     |                     |                      |                   |
| Benign                        |                     |                     |                        |                        |                      |                     |                     |                     |                     |                      |                   |
| Malignant Tumour              |                     |                     |                        |                        |                      |                     |                     |                     |                     |                      |                   |
| <b>SKIN/MUCOSA</b>            |                     |                     |                        |                        |                      |                     |                     |                     |                     |                      |                   |
| Trichilemmona                 |                     |                     |                        |                        |                      |                     |                     |                     |                     |                      |                   |
| MCL, FP, AK, F                | X                   | X                   |                        |                        |                      | X                   | X                   | X                   | X                   |                      |                   |
| OP                            | X                   | X                   |                        |                        |                      | X                   | X                   | X                   | X                   |                      |                   |
| SP                            |                     |                     |                        |                        |                      |                     |                     |                     |                     |                      |                   |
| Lipomas                       |                     |                     |                        |                        |                      |                     |                     |                     |                     |                      |                   |
| Malignant Tumour              |                     |                     |                        |                        |                      |                     |                     |                     |                     |                      |                   |
| <b>GASTROINTESTINAL TRACT</b> |                     |                     |                        |                        |                      |                     |                     |                     |                     |                      |                   |
| GI polyps                     |                     |                     |                        |                        |                      |                     |                     |                     |                     |                      |                   |
| Benign (hamartoma)            |                     |                     |                        |                        |                      |                     |                     |                     |                     |                      |                   |
| Malignant Tumour              |                     |                     |                        |                        |                      |                     |                     |                     |                     |                      | X                 |
| <b>OTHER BENIGN</b>           |                     |                     |                        |                        |                      |                     |                     |                     |                     |                      |                   |
| <b>OTHER CANCERS</b>          |                     |                     |                        |                        |                      |                     |                     |                     |                     |                      |                   |
| <b>SI SCORE</b>               | 1                   | 1                   | 1                      | 1                      | 1                    | 0                   | 4                   | 4                   | 4                   | 1                    | 0                 |
| <b>REFERENCES</b>             | Hobert et al., 2014 | Hobert et al., 2014 | Vanderver et al., 2014 | Vanderver et al., 2014 | Frazier et al., 2014 | Bubien et al., 2013 | Bubien et al., 2013 | Bubien et al., 2013 | Bubien et al., 2013 | Frazier et al., 2014 | Nagy et al., 2011 |

| Mutation                      | Y16H | D22E   | D24Y | D24Y    | D24Y | D24G | D24H | D24V | L25F | T26P | Y27N |
|-------------------------------|------|--------|------|---------|------|------|------|------|------|------|------|
| Diagnosis                     | CS   | ASD    | BRRS | CS      | CS   | CS   | CS   | CS   | ASD  |      | CS   |
| Sex                           | F    | M      | M    |         | F    | F    | F    | F    | M    | F    | F    |
| Age                           | 65y  |        | 4y   |         | 49y  | 46y  | 28y  | 7y   | 19y  |      | 46y  |
| <b>CNS</b>                    |      |        |      |         |      |      |      |      |      |      |      |
| Macrocephaly                  |      | X      | X    |         |      |      | X    | X    | X    | X    |      |
| LDD                           |      |        |      |         |      |      |      |      |      | X    |      |
| Benign Tumour                 |      |        |      |         |      |      |      |      |      |      |      |
| Malignant Tumour              |      |        | X    |         |      |      |      |      |      |      |      |
| MR/DD                         |      |        |      |         |      |      |      |      |      |      |      |
| <b>THYROID</b>                |      |        |      |         |      |      |      |      |      |      |      |
| Benign (adenoma, goitre)      |      |        |      | X       |      |      | X    |      |      | X    |      |
| Malignant                     |      |        |      |         |      |      |      |      |      |      |      |
| <b>BREASTS</b>                |      |        |      |         |      |      |      |      |      |      |      |
| Benign                        |      |        |      | X       |      |      |      |      |      |      |      |
| Malignant Tumour              | X    |        |      | X       | X    | X    | X    | X    |      |      | X    |
| <b>SKIN/MUCOSA</b>            |      |        |      |         |      |      |      |      |      |      |      |
| Trichilemmona                 |      |        |      |         |      |      |      |      |      |      |      |
| MCL, FP, AK, PPK, F           |      |        |      | X       |      |      | X    |      |      |      |      |
| OP                            |      |        |      | X       |      |      |      |      |      |      |      |
| SP                            |      |        |      |         |      |      |      |      |      |      |      |
| Lipomas                       |      |        | X    |         |      |      |      |      |      |      |      |
|                               |      |        | X    |         |      |      |      |      |      |      |      |
| Malignant Tumour              |      |        |      | X       |      |      |      |      |      |      |      |
| <b>GASTROINTESTINAL TRACT</b> |      |        |      |         |      |      |      |      |      |      |      |
| GI polyps                     |      |        |      |         |      |      |      |      |      |      |      |
| Benign (hamartoma)            |      |        |      |         |      |      |      |      |      |      |      |
| Malignant Tumour              |      |        |      |         |      |      |      |      |      |      |      |
| <b>OTHER BENIGN</b>           |      |        |      |         |      |      |      |      |      |      |      |
| <b>OTHER CANCERS</b>          |      |        |      |         |      |      |      |      |      |      |      |
| <b>SI SCORE</b>               | 4    | 0      | 2    | 8       | 4    | 6    | 5    | 0    | 2    | 4    |      |
|                               | ENCA | GU les | ENCA | ENCA-RC | UTLM | RC   |      |      |      |      |      |

Ngeow et al., 2007 al., 2009 al., 2013 al., 2014 al., 2014 al., 2012 al., 2012 al., 2014 al., 2014

**REFERENCES**

| Mutation                      | Y27C  | P30L | A34D | A34D | A34D | M35R | M35T | G36R | P38H | A39P   | G44D |
|-------------------------------|-------|------|------|------|------|------|------|------|------|--------|------|
| Diagnosis                     | CS    | CS   | BRRS | BRRS | BRRS | JPC  | PLS  | CS   | ASD  | CS     |      |
| Sex                           | F     |      | M    | M    | M    | M    | M    | F    | M    | F      | F    |
| Age                           | 3y10m |      | 10y  | 10y  | 10y  | 7y   | 7y   | 47y  | 15y  | 50-59y | 27m  |
| <b>CNS</b>                    |       |      |      |      |      |      |      |      |      |        |      |
| Macrocephaly                  | X     | X    | X    | X    | X    |      | X    | X    | X    | X      | X    |
| LDD                           | X     |      |      |      |      |      |      |      |      |        |      |
| Benign Tumour                 |       |      |      |      |      |      |      |      |      |        |      |
| Malignant Tumour              | X     |      | X    | X    | X    |      | X    |      |      |        | X    |
| MR/DD                         |       |      |      |      |      |      |      |      |      |        |      |
| <b>THYROID</b>                |       |      |      |      |      |      |      |      |      |        |      |
| Benign (adenoma, goitre)      |       |      |      |      |      |      |      |      |      | X      |      |
| Malignant                     |       |      |      |      |      |      |      |      |      |        |      |
| <b>BREASTS</b>                |       |      |      |      |      |      |      |      |      |        |      |
| Benign                        |       |      |      |      |      |      |      |      |      |        |      |
| Malignant Tumour              |       |      |      |      |      |      |      | X    |      | FBD    |      |
| <b>SKIN/MUCOSA</b>            |       |      |      |      |      |      |      |      |      |        |      |
| Trichilemmona                 |       |      |      |      |      |      |      | X    |      |        |      |
| MCL, FP, AK, PPK, F           |       | X    |      |      |      |      |      | X    |      | X      |      |
| OP                            |       |      |      |      |      |      |      | X    |      | X      |      |
| SP                            |       | X    | X    | X    | X    |      | X    |      | X    |        |      |
| Lipomas                       |       |      | X    | X    | X    |      |      |      | X    |        |      |
| Malignant Tumour              |       |      |      |      |      |      |      |      |      |        |      |
| <b>GASTROINTESTINAL TRACT</b> |       |      |      |      |      |      |      |      |      |        |      |
| GI polyps                     |       |      |      |      |      |      |      | X    |      | X      |      |
| Benign (hamartoma)            |       |      |      |      |      | JPC  |      |      |      |        |      |
| Malignant Tumour              |       |      |      |      |      |      |      |      |      |        |      |
| <b>OTHER BENIGN</b>           |       |      |      |      |      |      |      |      |      |        |      |
| <b>OTHER CANCERS</b>          |       |      |      |      |      |      |      |      |      |        |      |
| <b>SI SCORE</b>               | 1     | 1    | 2    | 2    | 2    | 1    | 1    | 4    | 5    | 1      | 7    |

VanderVer Bubien et al., 2013  
 Marsh et al., 1999  
 Marsh et al., 1999  
 Marsh et al., 1999  
 Olschwang Zhou et al., 2000  
 Celebi et al., 2000  
 Klein et al., 2013  
 Klein et al., 2013  
 Tate et al., 2008  
 Varga et al., 2009



| Mutation                 | Y68H | Y68H | Y68C | L70P | L70V | T78A | A79T | N82T | Y88C | D92A |
|--------------------------|------|------|------|------|------|------|------|------|------|------|
| Diagnosis                | CS   | ASD  | CS   | CS   | ASD  | ASD  | BC   | BC   | PHTS | CS   |
| Sex                      | F    | M    | F    | M    | M    | F    | F    | F    | M    |      |
| Age                      | 75y  | 2y   | 46y  | 31y  | 13y  |      | 36y  | 35y  | 1y   |      |
| <b>CNS</b>               |      |      |      |      |      |      |      |      |      |      |
| Macrocephaly             |      | X    |      |      | X    | X    |      |      | X    | X    |
| LDD                      |      |      |      |      |      |      |      |      |      |      |
| Benign Tumour            |      |      |      |      |      |      |      |      |      |      |
| Malignant Tumour         |      |      |      |      |      |      |      |      |      |      |
| MR/DD                    |      |      |      |      | X    |      |      | X    |      |      |
| <b>THYROID</b>           |      |      |      |      |      |      |      |      |      |      |
| Benign (adenoma, goitre) | X    |      |      |      | X    |      |      |      |      | X    |
| Malignant                |      |      | X    | X    |      |      |      |      |      |      |
| <b>BREASTS</b>           |      |      |      |      |      |      |      |      |      |      |
| Benign                   | X    |      |      |      |      |      | X    | X    |      | X    |
| Malignant Tumour         |      |      | X    |      |      |      | X    | X    |      |      |
| <b>SKIN/MUCOSA</b>       |      |      |      |      |      |      |      |      |      |      |
| Trichilemmona            | X    |      |      |      |      |      |      |      |      |      |
| MCL, FP, AK, PPK, F      | X    |      |      |      |      |      |      |      |      | X    |
| OP                       | X    |      |      |      | X    |      |      |      |      | X    |
| SP                       |      |      |      |      |      |      |      |      |      |      |
| Lipomas                  |      |      |      |      | X    |      |      |      |      | X    |
| Malignant Tumour         |      |      |      |      |      |      |      |      |      |      |

### GASTROINTESTINAL TRACT

GI polyps

Benign (hamartoma)

Malignant Tumour

### OTHER BENIGN

### OTHER CANCERS

### SI SCORE

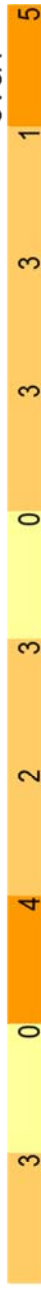

Marsh et al., 1998  
 Frazier et al., 2014  
 Ngeow et al., 2014  
 Marsh et al., 1998  
 Hobert et al., 2014  
 Schaaf et al., 2011  
 Figer et al., 2002  
 2002  
 al., 2012  
 al., 2013

### REFERENCES



| Mutation                      | L108P            | L108P               | L108P              | L112P             | H118P               | V119I               | V119I               | H123Q                | H123Q                        | H123Q | H123R |
|-------------------------------|------------------|---------------------|--------------------|-------------------|---------------------|---------------------|---------------------|----------------------|------------------------------|-------|-------|
| Diagnosis                     | PHTS             | PHTS                | CS                 | CS                | ASD                 | Mcancer             | Mcancer             | ASD                  | CS                           | CS    | CS    |
| Sex                           |                  |                     | F                  | F                 |                     | F                   | F                   | F                    | F                            | F     | M     |
| Age                           |                  | 50y                 | 26y                |                   |                     |                     |                     | 2y6m                 | 28y                          |       |       |
| <b>CNS</b>                    |                  |                     |                    |                   |                     |                     |                     |                      |                              |       |       |
| Macrocephaly                  | X                |                     | X                  | X                 | X                   |                     |                     | X                    | X                            | X     | X     |
| LDD                           |                  |                     | X                  | X                 |                     |                     |                     |                      |                              |       |       |
| Benign Tumour                 |                  |                     |                    |                   |                     |                     |                     |                      |                              |       |       |
| Malignant Tumour              |                  |                     | X                  | X                 |                     |                     |                     |                      |                              |       |       |
| MR/DD                         | X                |                     | X                  | X                 | X                   |                     |                     | X                    |                              |       |       |
| <b>THYROID</b>                |                  |                     |                    |                   |                     |                     |                     |                      |                              |       |       |
| Benign (adenoma, goitre)      |                  | X                   | X                  | X                 |                     |                     |                     |                      |                              | X     | X     |
| Malignant                     |                  |                     |                    |                   |                     |                     |                     |                      |                              |       | X     |
| <b>BREASTS</b>                |                  |                     |                    |                   |                     |                     |                     |                      |                              |       |       |
| Benign                        | FBD              | X                   | X                  | X                 |                     |                     |                     |                      | X                            |       |       |
| Malignant Tumour              |                  | X                   | X                  |                   |                     | X                   | X                   |                      |                              |       |       |
| <b>SKIN/MUCOSA</b>            |                  |                     |                    |                   |                     |                     |                     |                      |                              |       |       |
| Trichilemmona                 |                  |                     | X                  | X                 |                     |                     |                     |                      |                              |       |       |
| MCL, FP,AK, PPK, F            |                  |                     | X                  | X                 |                     |                     |                     |                      |                              |       | X     |
| OP                            |                  |                     | X                  | X                 |                     |                     |                     |                      |                              |       |       |
| SP                            |                  |                     |                    |                   |                     |                     |                     |                      |                              |       |       |
| Lipomas                       | X                | X                   |                    |                   |                     |                     |                     |                      |                              |       |       |
| Malignant Tumour              |                  |                     | X                  |                   |                     |                     |                     |                      |                              |       |       |
| <b>GASTROINTESTINAL TRACT</b> |                  |                     |                    |                   |                     |                     |                     |                      |                              |       |       |
| GI polyps                     |                  | X                   |                    |                   |                     |                     |                     |                      |                              |       |       |
| Benign (hamartoma)            |                  |                     |                    |                   |                     |                     |                     |                      |                              |       |       |
| Malignant Tumour              |                  |                     |                    |                   |                     |                     |                     |                      |                              | X     |       |
| <b>OTHER BENIGN</b>           |                  |                     |                    |                   |                     |                     |                     |                      |                              |       |       |
| <b>OTHER CANCERS</b>          | VASC les         | GU les              |                    |                   |                     |                     |                     |                      |                              |       |       |
| <b>SI SCORE</b>               | OVCA             | ENCA                | ENCA               | ENCA              | ENCA                | LUNG                | ENCA                | ENCA                 | ENCA                         | ENCA  | ENCA  |
|                               | 6                | 7                   | 7                  | 7                 | 11                  | 1                   | 4                   | 4                    | 1                            | 4     | 4     |
| <b>REFERENCES</b>             | Tan et al., 2007 | Bubien et al., 2013 | Ngeow et al., 2013 | Tsou et al., 1998 | Orrico et al., 2009 | deVivo et al., 2000 | deVivo et al., 2000 | McBride et al., 2010 | Kerseboom Nelen et al., 1997 |       |       |



| Mutation                      | H123D                  | C124R              | C124R              | C124R              | C124R               | A126P               | K128E                | K128N              | G129R             | G129R    | G129E             |
|-------------------------------|------------------------|--------------------|--------------------|--------------------|---------------------|---------------------|----------------------|--------------------|-------------------|----------|-------------------|
| Diagnosis                     | CS                     | CS                 | CS                 | CS                 | CS                  | CS                  | CS                   | CS                 | CS                | CS       | CS                |
| Sex                           | F                      | F                  |                    |                    |                     | M                   | M                    | M                  | F                 | M        |                   |
| Age                           | 53y                    |                    |                    |                    |                     | 35y                 | 23y                  | 35y                | 14y7m             |          |                   |
| <b>CNS</b>                    |                        |                    |                    |                    |                     |                     |                      |                    |                   |          |                   |
| Macrocephaly                  | X                      | X                  |                    |                    |                     | X                   | X                    |                    | X                 | X        |                   |
| LDD                           |                        |                    |                    |                    |                     |                     |                      |                    |                   |          |                   |
| Benign Tumour                 |                        |                    |                    |                    |                     |                     | X                    |                    | X                 |          |                   |
| Malignant Tumour              |                        |                    |                    |                    |                     |                     |                      |                    | X                 |          |                   |
| MR/DD                         |                        |                    |                    |                    |                     |                     |                      |                    | X                 |          |                   |
| <b>THYROID</b>                |                        |                    |                    |                    |                     |                     |                      |                    |                   |          |                   |
| Benign (adenoma, goitre)      | X                      | X                  | X                  | X                  | X                   | X                   | X                    |                    | X                 | X        | X                 |
| Malignant                     |                        |                    |                    |                    |                     |                     |                      |                    |                   |          |                   |
| <b>BREASTS</b>                |                        |                    |                    |                    |                     |                     |                      |                    |                   |          |                   |
| Benign                        |                        |                    | X                  | X                  | X                   |                     |                      |                    |                   |          | X                 |
| Malignant Tumour              |                        |                    |                    |                    |                     |                     |                      |                    |                   |          |                   |
| <b>SKIN/MUCOSA</b>            |                        |                    |                    |                    |                     |                     |                      |                    |                   |          |                   |
| Trichilemmona                 | X                      |                    |                    |                    |                     |                     |                      |                    |                   |          |                   |
| MCL, FP, AK, PPK, F           | X                      | X                  | X                  | X                  | X                   |                     |                      |                    |                   |          | X                 |
| OP                            | X                      |                    |                    |                    |                     |                     | X                    |                    |                   |          |                   |
| SP                            |                        |                    |                    |                    |                     | X                   | X                    |                    |                   |          |                   |
| Lipomas                       |                        |                    |                    |                    |                     | X                   |                      |                    |                   |          |                   |
| Malignant Tumour              |                        |                    |                    |                    |                     |                     |                      |                    |                   |          |                   |
| <b>GASTROINTESTINAL TRACT</b> |                        |                    |                    |                    |                     |                     |                      |                    |                   |          |                   |
| GI polyps                     |                        |                    |                    |                    |                     |                     |                      |                    | X                 |          |                   |
| Benign (hamartoma)            |                        |                    | X                  | X                  | X                   | X                   |                      | X                  |                   |          | X                 |
| Malignant Tumour              |                        |                    |                    | X                  | X                   |                     |                      | X                  |                   |          |                   |
| <b>OTHER BENIGN</b>           |                        |                    |                    |                    |                     |                     |                      |                    |                   |          |                   |
| <b>OTHER CANCERS</b>          | OC                     |                    |                    |                    |                     |                     | VASC les             |                    |                   | VASC les |                   |
| <b>SI SCORE</b>               | 3                      | 2                  | 4                  | 4                  | 6                   | 3                   | 3                    | 4                  | 3                 | 5        | 2                 |
| <b>REFERENCES</b>             | Bussaglia et al., 2002 | Nelen et al., 1997 | Nelen et al., 1997 | Nelen et al., 1997 | Mester et al., 2012 | Mester et al., 2012 | Buschet et al., 2013 | Ngeow et al., 2013 | Elia et al., 2012 | UNPUB    | Liaw et al., 1997 |



| Mutation                      | R130Q | R130Q | R130Q | R130Q | R130G | R130G | R130G | R130G | R130G | R130G | R130L |
|-------------------------------|-------|-------|-------|-------|-------|-------|-------|-------|-------|-------|-------|
| Diagnosis                     | CS    | CS    | CS    | CS    | CS    | CS    | CS    | CS    | CS    | CS    | CS    |
| Sex                           | F     | F     | F     | F     | F     | F     |       |       |       |       |       |
| Age                           | 42y   | 29y   | 48y   | 40y   |       |       |       |       |       |       |       |
| <b>CNS</b>                    |       |       |       |       |       |       |       |       |       |       |       |
| Macrocephaly                  | X     |       |       | X     | X     | X     | X     | X     | X     | X     | X     |
| LDD                           |       |       |       |       |       |       |       |       |       |       |       |
| Benign Tumour                 |       |       |       |       |       |       |       |       |       |       |       |
| Malignant Tumour              |       |       |       |       |       |       |       |       |       |       |       |
| MR/DD                         |       |       |       |       |       |       |       |       |       |       |       |
| <b>THYROID</b>                |       |       |       |       |       |       |       |       |       |       |       |
| Benign (adenoma, goitre)      | X     |       |       | X     |       |       |       |       |       |       | X     |
| Malignant                     |       |       |       |       |       |       |       |       |       |       |       |
| <b>BREASTS</b>                |       |       |       |       |       |       |       |       |       |       |       |
| Benign                        | X     |       |       |       |       |       |       |       |       |       |       |
| Malignant Tumour              | X     | X     | X     | X     |       |       |       |       |       |       |       |
| <b>SKIN/MUCOSA</b>            |       |       |       |       |       |       |       |       |       |       |       |
| Trichilemmona                 |       |       |       |       |       |       |       |       |       |       |       |
| MCL, FP, AK, PPK, F           |       |       |       |       |       |       | X     | X     | X     | X     | X     |
| OP                            |       |       |       |       |       |       | X     |       |       |       |       |
| SP                            |       |       |       |       |       |       |       |       |       |       |       |
| Lipomas                       | X     |       |       |       |       |       |       | X     | X     | X     |       |
| Malignant Tumour              |       |       |       |       |       |       |       |       |       |       |       |
| <b>GASTROINTESTINAL TRACT</b> |       |       |       |       |       |       |       |       |       |       |       |
| GI polyps                     |       |       |       |       |       |       |       |       |       |       |       |
| Benign (hamartoma)            |       |       |       |       |       |       |       |       |       |       |       |
| Malignant Tumour              |       |       |       |       |       |       |       |       |       |       |       |
| <b>OTHER BENIGN</b>           |       |       |       |       |       |       |       |       |       |       |       |
| <b>OTHER CANCERS</b>          |       |       |       |       |       |       |       |       |       |       |       |
| <b>SI SCORE</b>               |       |       |       |       |       |       |       |       |       |       |       |
|                               |       | OVCA  |       | UF    |       |       |       |       |       |       |       |
|                               | 5     | 4     | 4     | 2     | 2     | 4     | 4     | 1     | 1     | 1     | 2     |
|                               | 3     |       |       |       |       |       |       |       |       |       |       |

Ngeowet al., 2013  
Ngeowet al., 2014  
Ngeowet al., 2014  
Ngeowet al., 2014  
Mester et al., 2012  
Bubien et al., 2013  
Bubien et al., 2013

**REFERENCES**

| Mutation                      | R130L               | R130L              | R130L              | R130L               | T131I               | T131I               | T131I            | T131I               | G132A               | G132D               | G132D               | G132D               | G132D               |
|-------------------------------|---------------------|--------------------|--------------------|---------------------|---------------------|---------------------|------------------|---------------------|---------------------|---------------------|---------------------|---------------------|---------------------|
| Diagnosis                     | CS                  | CS                 | CS                 | CS                  | CS/ASD              | ASD                 | PHTS             | CS                  | CS                  | CS                  | CS                  | CS                  | CS                  |
| Sex                           | F                   | F                  | F                  | F                   | F                   | F                   | M                | M                   | M                   | M                   | M                   | M                   | M                   |
| Age                           | 21y                 | 21y                | 21y                | 21y                 | 4y1m                | 4y1m                | 27y              | 27y                 | 27y                 | 53y                 | 53y                 | 53y                 | 53y                 |
| <b>CNS</b>                    |                     |                    |                    |                     |                     |                     |                  |                     |                     |                     |                     |                     |                     |
| Macrocephaly                  | X                   |                    |                    | X                   | X                   | X                   | X                |                     | X                   |                     | X                   |                     | X                   |
| LDD                           |                     |                    |                    |                     |                     |                     |                  |                     |                     |                     |                     |                     |                     |
| Benign Tumour                 |                     |                    |                    |                     |                     |                     |                  |                     |                     |                     |                     |                     |                     |
| Malignant Tumour              |                     |                    |                    |                     |                     |                     |                  |                     |                     |                     |                     |                     |                     |
| MR/DD                         |                     |                    |                    | X                   |                     | X                   |                  | DGCC                |                     |                     |                     |                     |                     |
| <b>THYROID</b>                |                     |                    |                    |                     |                     |                     |                  |                     |                     |                     |                     |                     |                     |
| Benign (adenoma, goitre)      | X                   |                    |                    |                     | X                   |                     |                  |                     |                     | X                   |                     |                     | X                   |
| Malignant                     | X                   |                    |                    |                     |                     |                     |                  |                     |                     |                     |                     |                     | X                   |
| <b>BREASTS</b>                |                     |                    |                    |                     |                     |                     |                  |                     |                     |                     |                     |                     |                     |
| Benign                        | X                   |                    |                    |                     |                     |                     |                  |                     |                     |                     |                     |                     | X                   |
| Malignant Tumour              | X                   |                    |                    |                     |                     |                     |                  |                     |                     |                     |                     |                     | X                   |
| <b>SKIN/MUCOSA</b>            |                     |                    |                    |                     |                     |                     |                  |                     |                     |                     |                     |                     |                     |
| Trichilemmona                 |                     |                    |                    |                     |                     |                     |                  |                     |                     |                     |                     |                     |                     |
| MCL, FP, AK, PPK, F           | X                   |                    |                    |                     |                     |                     |                  |                     |                     |                     |                     |                     | X                   |
| OP                            | X                   |                    |                    |                     |                     |                     |                  |                     |                     |                     |                     |                     | X                   |
| SP                            | X                   |                    |                    |                     |                     |                     |                  |                     |                     |                     |                     |                     | X                   |
| Lipomas                       |                     |                    |                    |                     |                     |                     |                  |                     |                     |                     |                     |                     |                     |
| Malignant Tumour              |                     |                    |                    |                     |                     |                     |                  |                     |                     |                     |                     |                     |                     |
| <b>GASTROINTESTINAL TRACT</b> |                     |                    |                    |                     |                     |                     |                  |                     |                     |                     |                     |                     |                     |
| GI polyps                     | X                   |                    |                    |                     |                     |                     |                  |                     |                     |                     |                     |                     |                     |
| Benign (hamartoma)            |                     |                    |                    |                     | X                   |                     |                  |                     |                     |                     |                     |                     |                     |
| Malignant Tumour              |                     |                    |                    |                     |                     |                     |                  |                     |                     |                     |                     |                     |                     |
| <b>OTHER BENIGN</b>           |                     |                    |                    |                     |                     |                     |                  |                     |                     |                     |                     |                     |                     |
| <b>OTHER CANCERS</b>          |                     |                    |                    |                     |                     |                     |                  |                     |                     |                     |                     |                     |                     |
| <b>SI SCORE</b>               | 3                   | 10                 | 4                  | 1                   | 3                   | 1                   | 1                | 1                   | 2                   | 4                   | 6                   |                     |                     |
|                               |                     |                    |                    |                     |                     |                     |                  |                     |                     |                     |                     |                     |                     |
| <b>REFERENCES</b>             |                     |                    |                    |                     |                     |                     |                  |                     |                     |                     |                     |                     |                     |
|                               | Bubien et al., 2013 | Marsh et al., 1998 | Ngeow et al., 2014 | Bubien et al., 2013 | Bubien et al., 2013 | O'Roak et al., 2012 | Tan et al., 2007 | Derrey et al., 2004 | Heindl et al., 2012 | Bubien et al., 2013 | Heindl et al., 2012 | Bubien et al., 2013 | Bubien et al., 2013 |

UBC

RC





| Mutation                      | I135V              | I135V              | I135V              | I135V             | C136R              | C136R              | C136R              | C136R              | C136R              | C136R             | R142P              | A151D              |
|-------------------------------|--------------------|--------------------|--------------------|-------------------|--------------------|--------------------|--------------------|--------------------|--------------------|-------------------|--------------------|--------------------|
| Diagnosis                     |                    | ASD                | CS                 | CS                | CS                 | CS                 | D                  | CS                 | CS                 | CS                | CS                 | CS                 |
| Sex                           |                    |                    |                    | F                 |                    |                    |                    |                    | F                  |                   |                    |                    |
| Age                           |                    |                    |                    | 30y               |                    |                    |                    |                    | 33y                |                   |                    |                    |
| <b>CNS</b>                    |                    |                    |                    |                   |                    |                    |                    |                    |                    |                   |                    |                    |
| Macrocephaly                  | X                  | X                  | X                  |                   |                    | X                  |                    |                    |                    |                   | X                  | X                  |
| LDD                           |                    |                    |                    |                   |                    |                    |                    | X                  |                    |                   |                    |                    |
| Benign Tumour                 |                    |                    |                    |                   |                    |                    |                    |                    |                    |                   |                    |                    |
| Malignant Tumour              |                    |                    |                    |                   |                    |                    |                    |                    |                    |                   |                    |                    |
| MR/DD                         |                    |                    |                    |                   |                    | X                  |                    |                    |                    |                   |                    |                    |
| <b>THYROID</b>                |                    |                    |                    |                   |                    |                    |                    |                    |                    |                   |                    |                    |
| Benign (adenoma, goitre)      | X                  |                    | X                  | X                 |                    |                    |                    | X                  |                    |                   | X                  | X                  |
| Malignant                     |                    |                    |                    |                   |                    | X                  |                    | X                  |                    |                   |                    |                    |
| <b>BREASTS</b>                |                    |                    |                    |                   |                    |                    |                    |                    |                    |                   |                    |                    |
| Benign                        |                    |                    | X                  | X                 |                    |                    |                    |                    |                    |                   |                    |                    |
| Malignant Tumour              |                    |                    |                    |                   | X                  |                    |                    |                    |                    |                   |                    |                    |
| <b>SKIN/MUCOSA</b>            |                    |                    |                    |                   |                    |                    |                    |                    |                    | X                 |                    |                    |
| Trichilemmona                 |                    |                    |                    |                   |                    |                    |                    |                    |                    |                   |                    |                    |
| MCL, FP, AK, PPK, F           | X                  |                    | X                  | X                 |                    | X                  |                    | X                  |                    |                   | X                  | X                  |
| OP                            | X                  |                    | X                  | X                 |                    |                    |                    | X                  |                    |                   | X                  | X                  |
| SP                            |                    |                    |                    |                   |                    |                    |                    | X                  |                    |                   |                    |                    |
| Lipomas                       |                    | X                  | X                  | X                 |                    |                    | X                  |                    |                    |                   |                    | X                  |
| Malignant Tumour              |                    |                    |                    |                   |                    |                    |                    |                    |                    |                   |                    |                    |
| <b>GASTROINTESTINAL TRACT</b> |                    |                    |                    |                   |                    |                    |                    |                    |                    |                   |                    |                    |
| GI polyps                     | X                  |                    | X                  | X                 |                    | X                  |                    | X                  |                    |                   | X                  | X                  |
| Benign (hamartoma)            |                    |                    |                    |                   |                    |                    |                    |                    |                    |                   |                    |                    |
| Malignant Tumour              |                    |                    |                    | X                 |                    |                    |                    |                    |                    |                   |                    |                    |
| <b>OTHER BENIGN</b>           |                    |                    |                    | GU les            |                    |                    |                    |                    |                    |                   |                    |                    |
| <b>OTHER CANCERS</b>          |                    |                    |                    |                   |                    |                    |                    |                    |                    |                   |                    |                    |
| <b>SI SCORE</b>               | 3                  | 1                  | 4                  | 7                 | 7                  | 2                  | 6                  | 6                  | 3                  | 3                 | 3                  | 3                  |
| <b>REFERENCES</b>             | ENCA               |                    |                    |                   |                    |                    |                    |                    |                    |                   |                    |                    |
|                               | Bubienet al., 2013 | Bubienet al., 2013 | Bubienet al., 2013 | Kubo et al., 2000 | Bubienet al., 2013 | Bubienet al., 2013 | Bubienet al., 2013 | Bubienet al., 2013 | Bubienet al., 2013 | Ngeowet al., 2014 | Bubienet al., 2013 | Bubienet al., 2013 |

|                               |                     |                      |                     |                    |                    |                    |                      |                     |                      |                    |
|-------------------------------|---------------------|----------------------|---------------------|--------------------|--------------------|--------------------|----------------------|---------------------|----------------------|--------------------|
| Mutation                      | Y155N               | Y155C                | Y155C               | Y155C              | E157G              | V158I              | V158I                | D162E               | G165R                | G165E              |
| Diagnosis                     | CS                  | CS                   | CS                  | CS                 | ASD                | F                  | F                    | CS                  | CS                   | CS                 |
| Sex                           | F                   | F                    | F                   | F                  | 3y8m               |                    |                      | M                   |                      | F                  |
| Age                           | 50y                 | 50y                  | 66y                 | 66y                |                    |                    |                      | 3y                  | 59y                  |                    |
| <b>CNS</b>                    |                     |                      |                     |                    |                    |                    |                      |                     |                      |                    |
| Macrocephaly                  |                     | X                    | X                   | X                  | X                  |                    |                      | X                   |                      | X                  |
| LDD                           |                     |                      |                     |                    |                    |                    |                      |                     |                      |                    |
| Benign Tumour                 |                     |                      |                     |                    |                    |                    |                      |                     |                      |                    |
| Malignant Tumour              |                     |                      |                     |                    |                    |                    |                      |                     |                      |                    |
| MR/DD                         |                     |                      |                     |                    | X                  |                    |                      | X                   |                      |                    |
| <b>THYROID</b>                |                     |                      |                     |                    |                    |                    |                      |                     |                      |                    |
| Benign (adenoma, goitre)      | X                   | X                    |                     |                    |                    |                    |                      |                     |                      | X                  |
| Malignant                     |                     |                      |                     |                    |                    |                    |                      |                     |                      | X                  |
| <b>BREASTS</b>                |                     |                      |                     |                    |                    |                    |                      |                     |                      |                    |
| Benign                        |                     | X                    | X                   | X                  |                    |                    |                      |                     |                      | X                  |
| Malignant Tumour              |                     | X                    | X                   |                    |                    | X                  |                      |                     | X                    |                    |
| <b>SKIN/MUCOSA</b>            |                     |                      |                     |                    |                    |                    |                      |                     |                      |                    |
| Trichilemmona                 |                     |                      |                     |                    |                    |                    |                      |                     |                      |                    |
| MCL, FP, AK, PPK, F           | X                   | X                    |                     |                    |                    |                    |                      |                     |                      | X                  |
| OP                            | X                   | X                    |                     |                    |                    |                    |                      |                     |                      |                    |
| SP                            |                     |                      |                     |                    |                    |                    |                      |                     |                      |                    |
| Lipomas                       |                     |                      |                     |                    |                    |                    |                      |                     |                      |                    |
| Malignant Tumour              | X                   |                      |                     | X                  |                    |                    |                      |                     |                      |                    |
| <b>GASTROINTESTINAL TRACT</b> |                     |                      |                     |                    |                    |                    |                      |                     |                      |                    |
| GI polyps                     |                     |                      |                     |                    |                    |                    |                      |                     |                      |                    |
| Benign (hamartoma)            |                     |                      |                     |                    |                    |                    |                      |                     |                      |                    |
| Malignant Tumour              |                     |                      |                     |                    |                    |                    |                      |                     |                      |                    |
| <b>OTHER BENIGN</b>           |                     |                      |                     |                    |                    |                    |                      |                     |                      |                    |
| <b>OTHER CANCERS</b>          |                     |                      |                     |                    |                    |                    |                      |                     |                      |                    |
| <b>SI SCORE</b>               |                     |                      |                     |                    |                    |                    |                      |                     |                      |                    |
|                               | 4                   | 2                    | 7                   | 2                  | 2                  | 1                  | 4                    | 2                   | 1                    | 2                  |
|                               | MT                  |                      |                     |                    |                    |                    | LGTC                 |                     |                      | L                  |
| <b>REFERENCES</b>             | Bubien et al., 2013 | Gicquel et al., 2003 | Bubien et al., 2013 | Ngeow et al., 2013 | Varga et al., 2009 | Varga et al., 2000 | de Vivo et al., 2000 | Mester et al., 2012 | Bannean et al., 2010 | Nelen et al., 1999 |





| Mutation                      | R173G | R173P | R173P | R173H | R173H | R173H | R173H | R173H | R173H | R173H | Y176C | L181P | T202I |
|-------------------------------|-------|-------|-------|-------|-------|-------|-------|-------|-------|-------|-------|-------|-------|
| Diagnosis                     | CS    | LD    | F     | CS    | M     | M     | M     | ASD   | ASD   | ASD   | ASD   | CS    |       |
| Sex                           | F     | F     | F     |       | M     | M     | M     | M     | M     | M     |       |       | M     |
| Age                           | 44y   |       | 42y   | 9y    | 43y   | 4y5m  |       |       |       |       |       |       | 1y8m  |
| <b>CNS</b>                    |       |       |       |       |       |       |       |       |       |       |       |       |       |
| Macrocephaly                  |       | X     | X     | X     | X     | X     | X     | X     | X     | X     | X     | X     |       |
| LDD                           |       | X     | X     |       |       |       |       |       |       |       |       |       |       |
| Benign Tumour                 |       |       |       |       |       |       |       |       |       |       |       |       |       |
| Malignant Tumour              |       |       |       |       |       |       |       |       |       |       |       |       |       |
| MR/DD                         |       |       | X     | X     |       |       |       |       |       | X     |       |       | X     |
| <b>THYROID</b>                |       |       |       |       |       |       |       |       |       |       |       |       |       |
| Benign (adenoma, goitre)      |       | X     | X     |       |       |       |       |       |       |       |       |       |       |
| Malignant                     |       |       |       |       |       |       |       |       |       |       |       |       |       |
| <b>BREASTS</b>                |       |       |       |       |       |       |       |       |       |       |       |       |       |
| Benign                        |       |       |       |       |       |       |       |       |       |       |       |       |       |
| Malignant Tumour              |       |       |       |       |       |       |       |       |       |       |       |       |       |
| <b>SKIN/MUCOSA</b>            |       | X     |       |       |       |       |       |       |       |       |       |       |       |
| Trichilemmona                 |       |       |       |       |       |       |       |       |       |       |       |       |       |
| MCL, FP, AK, PPK, F           |       | X     | X     |       |       |       |       |       |       |       |       |       | X     |
| OP                            |       |       |       |       |       |       |       |       | X     |       |       |       |       |
| SP                            |       |       |       |       |       |       |       |       | X     |       |       |       |       |
| Lipomas                       |       |       |       |       |       |       |       |       |       |       |       |       |       |
| Malignant Tumour              |       |       |       |       |       |       |       |       |       |       |       |       |       |
| <b>GASTROINTESTINAL TRACT</b> |       |       |       |       |       |       |       |       |       |       |       |       |       |
| GI polyps                     |       |       |       |       |       |       |       |       |       |       |       |       |       |
| Benign (hamartoma)            |       |       |       |       |       |       |       |       |       |       |       |       |       |
| Malignant Tumour              |       |       |       |       |       |       |       |       | X     |       |       |       |       |
| <b>OTHER BENIGN</b>           |       |       |       |       |       |       |       |       |       |       |       |       |       |
| <b>OTHER CANCERS</b>          |       |       |       |       |       |       |       |       |       |       |       |       |       |
| <b>SI SCORE</b>               | 2     | 3     | 4     | 4     | 1     | 1     | 0     | 2     | 0     | 1     | 1     | 1     | 2     |

VASC les

Ngeow et Kirches et Bubien et Lachlan et Lachlan et McBride et Orrico et Thiffault et Varga et al., 2014 al., 2010 al., 2010 al., 2013 al., 2007 al., 2007 al., 2010 al., 2009 al., 2004 al., 2009

| Mutation                      | C211W | V217D | R234Q   | F241S | P246L | P246L | P246L | P246L | D252V | D252G | D252G |
|-------------------------------|-------|-------|---------|-------|-------|-------|-------|-------|-------|-------|-------|
| Diagnosis                     | ASD   | CS    | Mcancer | ASD   | BRRS  | BRRS  | BRRS  | ASD   | ASD   | ASD   | CS    |
| Sex                           | M     |       | M       | M     | M     | M     | M     | M     | F     | M     |       |
| Age                           | 3y10m |       | 38y     | 2y5m  | 2y    | 2y    | 5y    | 5y    | 15y5m | 3y5m  |       |
| <b>CNS</b>                    |       |       |         |       |       |       |       |       |       |       |       |
| Macrocephaly                  | X     |       |         |       | X     |       | X     | X     | X     | X     | X     |
| LDD                           |       |       |         |       |       |       |       |       |       |       |       |
| Benign Tumour                 |       |       |         |       |       |       |       |       |       |       |       |
| Malignant Tumour              |       |       | OD, MnG |       |       |       |       |       |       |       |       |
| MR/DD                         | X     |       |         |       | X     |       |       |       |       | X     |       |
| <b>THYROID</b>                |       |       |         |       |       |       |       |       |       |       |       |
| Benign (adenoma, goitre)      |       |       |         |       |       |       |       |       |       |       |       |
| Malignant                     |       |       |         |       |       |       |       |       |       |       |       |
| <b>BREASTS</b>                |       |       |         |       |       |       |       |       |       |       |       |
| Benign                        |       |       |         |       |       |       |       |       |       |       |       |
| Malignant Tumour              |       |       |         |       |       |       |       |       |       |       |       |
| <b>SKIN/MUCOSA</b>            |       |       |         |       |       |       |       |       |       |       |       |
| Trichilemmona                 |       |       |         |       |       |       |       |       |       |       |       |
| MCL, FP, AK, PPK, F           |       |       |         |       |       |       |       |       |       |       | X     |
| OP                            |       | X     |         |       |       |       |       |       |       |       | X     |
| SP                            |       |       |         |       |       |       |       |       |       |       |       |
| Lipomas                       |       |       |         |       |       |       |       |       |       |       |       |
| Malignant Tumour              |       |       |         |       |       |       |       |       |       |       |       |
| <b>GASTROINTESTINAL TRACT</b> |       |       |         |       |       |       |       |       |       |       |       |
| GI polyps                     |       |       |         |       |       |       |       |       |       |       |       |
| Benign (hamartoma)            |       |       |         |       |       |       |       |       |       |       |       |
| Malignant Tumour              |       |       |         |       |       |       |       |       |       |       |       |
| <b>OTHER BENIGN</b>           |       |       |         |       |       |       |       |       |       |       |       |
| <b>OTHER CANCERS</b>          |       |       |         |       |       |       |       |       |       |       |       |
| <b>SI SCORE</b>               | 1     | 2     | 2       | 0     | 2     | 2     | 1     | 0     | 0     | 1     | 1     |

VASC les

Vanderver Kim et al., 2014  
 et al., 2014 2005  
 Staal et al., 2002  
 Butler et al., 2005  
 Butler et al., 2005  
 Marsh et al., 1999  
 Mester et al., 2012  
 Vanderver et al., 2014  
 Frazier et al., 2014  
 Butler et al., 2005  
 Bubien et al., 2013

| Mutation                      | V255A | W274L | N276S | T277R | T277R | T277R | T277R | T277R | T277R | T277R  | T277R | T277R | K289E |
|-------------------------------|-------|-------|-------|-------|-------|-------|-------|-------|-------|--------|-------|-------|-------|
| Diagnosis                     | ASD   | DD    | ASD   | CS    | CS    | CS    | CS    | CS    | CS    | CS/ASD | CS    | CS    | CS    |
| Sex                           | M     | F     |       |       |       |       |       |       |       | F      |       |       |       |
| Age                           | 4y4m  | 8m    |       |       |       |       |       |       |       |        |       |       | 27y   |
| <b>CNS</b>                    |       |       |       |       |       |       |       |       |       |        |       |       |       |
| Macrocephaly                  | X     | X     | X     | X     | X     | X     | X     | X     | X     | X      | X     | X     | X     |
| LDD                           |       |       |       |       |       |       |       |       |       |        |       |       |       |
| Benign Tumour                 |       |       |       |       |       |       |       |       |       |        |       |       |       |
| Malignant Tumour              |       |       |       |       |       |       |       |       |       |        |       |       |       |
| MR/DD                         |       | X     | X     |       |       |       |       |       |       |        |       |       |       |
| <b>THYROID</b>                |       |       |       |       |       |       |       |       |       |        |       |       |       |
| Benign (adenoma, goitre)      |       |       |       |       | X     | X     | X     | X     | X     |        |       |       |       |
| Malignant                     |       |       |       |       |       |       |       |       |       |        |       |       |       |
| <b>BREASTS</b>                |       |       |       |       |       |       |       |       |       |        |       |       |       |
| Benign                        |       |       |       |       |       |       |       |       | X     |        |       |       |       |
| Malignant Tumour              |       |       |       |       |       |       |       |       |       |        |       |       | X     |
| <b>SKIN/MUCOSA</b>            |       |       |       |       |       |       |       |       |       |        |       |       |       |
| Trichilemmona                 |       |       |       |       |       |       |       |       |       |        |       |       |       |
| MCL, FP, AK, PPK, F           |       |       |       | X     | X     | X     | X     | X     | X     | X      | X     | X     | X     |
| OP                            |       |       |       | X     | X     | X     | X     | X     | X     | X      | X     | X     | X     |
| SP                            |       |       |       |       |       |       |       |       |       |        |       |       |       |
| Lipomas                       |       |       |       |       |       |       |       |       |       |        |       |       |       |
| Malignant Tumour              |       |       |       | X     |       |       |       |       |       |        |       |       |       |
| <b>GASTROINTESTINAL TRACT</b> |       |       |       |       |       |       |       |       |       |        |       |       |       |
| GI polyps                     |       |       |       |       |       |       |       |       |       |        |       |       | X     |
| Benign (hamartoma)            |       |       |       |       |       |       |       |       |       |        |       |       | X     |
| Malignant Tumour              |       |       |       |       |       |       |       |       |       |        |       |       |       |
| <b>OTHER BENIGN</b>           |       |       |       |       |       |       |       |       |       |        |       |       |       |
| <b>OTHER CANCERS</b>          |       |       |       |       |       |       |       |       |       |        |       |       |       |
| <b>SI SCORE</b>               | 0     | 1     | 1     | 1     | 1     | 1     | 2     | 2     | 2     | 3      | 0     | 2     | 1     |

Klein et al., McBride et Orrico et Bubien et Banneau Chi et al., 2013 al., 2010 al., 2009 al., 2013 al., 2013 al., 2013 al., 2013 al., 2013 al., 2010 1998

**REFERENCES**

| Mutation                      | D326N                | R335L               | F337S                | K342N               | K342N               | V343E              | V343E              | V343E              | V343E              | V343E              | V343E              | V343E              | L345V              | L345V              |                      |
|-------------------------------|----------------------|---------------------|----------------------|---------------------|---------------------|--------------------|--------------------|--------------------|--------------------|--------------------|--------------------|--------------------|--------------------|--------------------|----------------------|
| Diagnosis                     | ASD                  | CS                  | CS                   | CS                  | HTS                 | CS                 | CS                 | CS                 | CS                 | CS                 | CS                 | CS                 | CS                 | CS                 |                      |
| Sex                           | F                    | F                   | M                    |                     |                     | F                  | F                  | M                  | F                  | F                  | F                  | F                  | F                  | F                  |                      |
| Age                           | 48y                  | 48y                 | 9y                   |                     |                     |                    |                    |                    |                    |                    |                    |                    | 36y                | 58y                |                      |
| <b>CNS</b>                    |                      |                     |                      |                     |                     |                    |                    |                    |                    |                    |                    |                    |                    |                    |                      |
| Macrocephaly                  | X                    |                     | X                    | X                   | X                   |                    |                    |                    |                    |                    |                    |                    |                    |                    |                      |
| LDD                           |                      |                     |                      |                     |                     |                    |                    |                    |                    |                    |                    |                    |                    |                    |                      |
| Benign Tumour                 |                      |                     |                      |                     |                     |                    |                    |                    |                    |                    |                    |                    |                    |                    |                      |
| Malignant Tumour              |                      |                     |                      |                     |                     |                    |                    |                    |                    |                    |                    |                    |                    |                    |                      |
| MR/DD                         | X                    |                     |                      |                     |                     |                    |                    |                    |                    |                    |                    |                    |                    |                    |                      |
| <b>THYROID</b>                |                      |                     |                      |                     |                     |                    |                    |                    |                    |                    |                    |                    |                    |                    |                      |
| Benign (adenoma, goitre)      |                      | X                   |                      |                     |                     | X                  | X                  | X                  |                    |                    |                    |                    |                    | X                  |                      |
| Malignant                     |                      |                     |                      |                     | X                   |                    |                    |                    |                    |                    |                    |                    |                    |                    |                      |
| <b>BREASTS</b>                |                      |                     |                      |                     |                     |                    |                    |                    |                    |                    |                    |                    |                    |                    |                      |
| Benign                        |                      |                     |                      |                     |                     |                    | X                  | X                  |                    |                    |                    |                    | X                  | X                  |                      |
| Malignant Tumour              |                      | X                   |                      |                     |                     | X                  |                    |                    | X                  |                    |                    |                    | X                  | X                  |                      |
| <b>SKIN/MUCOSA</b>            |                      |                     |                      |                     |                     |                    |                    |                    |                    |                    |                    |                    |                    |                    |                      |
| Trichilemmona                 |                      | X                   |                      |                     |                     |                    |                    |                    |                    |                    |                    |                    |                    |                    |                      |
| MCL, FP, AK, PPK, F           |                      | X                   |                      |                     |                     |                    | X                  |                    |                    |                    |                    |                    | X                  | X                  |                      |
| OP                            |                      | X                   |                      |                     |                     |                    |                    |                    |                    |                    |                    |                    |                    |                    |                      |
| SP                            |                      |                     | X                    |                     |                     |                    |                    |                    |                    |                    |                    |                    |                    |                    |                      |
| Lipomas                       |                      |                     |                      |                     |                     |                    |                    |                    |                    |                    |                    |                    |                    |                    |                      |
| Malignant Tumour              |                      |                     |                      |                     |                     |                    |                    |                    |                    |                    |                    |                    |                    |                    |                      |
| <b>GASTROINTESTINAL TRACT</b> |                      |                     |                      |                     |                     |                    |                    |                    |                    |                    |                    |                    |                    |                    |                      |
| GI polyps                     |                      |                     |                      |                     |                     |                    |                    |                    |                    |                    |                    |                    |                    |                    |                      |
| Benign (hamartoma)            |                      |                     | X                    |                     |                     |                    | X                  |                    |                    |                    |                    |                    |                    |                    |                      |
| Malignant Tumour              |                      |                     |                      |                     |                     |                    |                    |                    |                    |                    |                    |                    |                    |                    |                      |
| <b>OTHER BENIGN</b>           |                      |                     |                      |                     |                     |                    |                    |                    |                    |                    |                    |                    |                    |                    |                      |
| <b>OTHER CANCERS</b>          |                      |                     |                      |                     |                     |                    |                    |                    |                    |                    |                    |                    |                    |                    |                      |
| <b>SI SCORE</b>               | 1                    | 4                   | 4                    | 2                   | 3                   | 1                  | 4                  | 4                  | 4                  | 5                  | 3                  | 2                  | 3                  | 4                  |                      |
| <b>REFERENCES</b>             | Buxbaum et al., 2007 | Sawada et al., 2000 | Lachlan et al., 2007 | Bubien et al., 2013 | Bubien et al., 2013 | Lynch et al., 1997 | Lynch et al., 1997 | Lynch et al., 1997 | Lynch et al., 1997 | Lynch et al., 1997 | Lynch et al., 1997 | Lynch et al., 1997 | Lynch et al., 1997 | Ngeow et al., 2014 | Buschet et al., 2013 |

NE

## Abbreviations

|          |                                            |
|----------|--------------------------------------------|
| AK       | Acral Keratosis                            |
| CNS      | Central Nervous System                     |
| CRC      | Colorectal Cancer                          |
| DGCC     | Dysplastic Gangliocytoma of the Cerebellum |
| ENCA     | Endometrial Cancer                         |
| F        | Fibromas                                   |
| FBD      | Fibrocystic disease                        |
| FP       | Facial papules                             |
| GgNa     | Ganglioneuroma                             |
| GI       | Gastrointestinal                           |
| GU les   | Genitourinary lesions                      |
| H        | Hemangioma                                 |
| H reflux | Hernia reflux                              |
| HN       | Hydronephrosis                             |
| JPC      | Juvenile Polyposis Coli                    |
| L        | Lymphoma                                   |
| LDD      | Lhermitte-Duclos disease                   |
| LGTC     | Lower Genital Tract Cancer                 |
| LH       | Lymphoid Hyperplasia                       |
| LM       | Leiomyoma                                  |
| LPH      | Lipomatous Hemangioma                      |
| MCL      | Mucocutaneous Lesions                      |
| MnG      | Meningioma                                 |
| MR/DD    | Mental Retardation/Developmental Delay     |
| MT       | Multiple Tumours                           |
| NE       | Neuroma                                    |
| NP       | Nephrolithiasis                            |
| OC       | Ovaric Cysts                               |
| OD       | Oligodendrioma                             |
| OP       | Oral mucosal Papillomatosis                |
| OVCA     | Ovarian cancer                             |
| PGT      | Papillary Carcinoma                        |
| PLS      | Proteus-Like Syndrome                      |
| PPK      | Palmoplantar Keratoses                     |
| RC       | Renal Carcinoma                            |
| RH       | Renal Hamartoma                            |
| SP       | Speckled Penis                             |
| UBC      | Urinary Bladder Cancer                     |
| UF       | Uterin Fibroids                            |
| UNPUB    | Unpublished                                |
| UTLM     | Uterine Leiomyoma                          |
| VASC les | Vascular lesions                           |

## **Supporting Materials and Methods**

### **Expression vectors and recombinant PTEN protein expression**

Plasmid and lentiviral expression vectors for untagged and glutathione S-transferase (GST)-tagged human PTEN have been previously described [58 59]. The mutant expression vectors derived from pGEX6P1 PTEN and pHR-SIN PTEN were prepared by site-directed mutagenesis of the corresponding PTEN WT constructs with primers containing missense mutations. Recombinant wild-type and mutant forms of PTEN were expressed in *Escherichia coli* and purified by glutathione-affinity chromatography.

### **Immunoblotting**

Protein gel electrophoresis was conducted with 10 µg of total soluble protein per sample using NuPage Bis-Tris 4-12% gradient polyacrylamide gels (Invitrogen Life Technologies) following manufacturers protocols. Proteins were transferred onto PVDF membrane (Perkin-Elmer) and membranes blocked in 5% milk powder/TBST for 1 hour at room temperature (RT). Blocked membranes were incubated overnight with primary antibodies. Antibodies used were: anti-P(Ser473)Akt and anti-P(Thr308)Akt (Cat. n.9271L and 9275L, Cell Signaling Technology), anti-PTEN (A2B1 Cat. n. sc-7974, Santa Cruz Biotechnology and PTEN 138G6, Cat. n. 9559S, Cell Signaling Technology), anti-GAPDH (Cat. n. AB2302, Millipore), anti-Akt (Cat. n. 9272, Cell Signaling Technology), anti-P(Thr246)PRAS40 (Cat. n. 29975, Cell Signaling Technology), anti-PRAS40 (Cat. n. 2691S, Cell Signaling Technology). Antibody complexes were detected by 1 hour incubation at RT with HRP conjugated secondary antibodies (Vector Labs). Blots were developed with ECL plus (Millipore)

and chemiluminescence imaged directly using an ImageQuant LAS4000 imaging system.

### **Lipid phosphatase assay**

The preparation of 3-<sup>33</sup>P labelled phosphoinositide substrate has been described previously ([58 59]. To test the lipid phosphatase activity of PTEN against PtdIns(3,4,5)P<sub>3</sub>, lipid vesicles were prepared by sonication containing 100 μM phosphatidylcholine (PC), 1 μM unlabelled diC16 PtdIns(3,4,5)P<sub>3</sub> and a volume of <sup>33</sup>P-PtdIns(3,4,5)P<sub>3</sub> to give 100,000 cpm per assay. PTEN was immunoprecipitated using anti-PTEN A2B1 antibody in lysis buffer (50 mM Tris-HCL pH 7.4, 150 mM NaCl, 1 mM EDTA, 1 mM EGTA, 5 mM Sodium pyrophosphate, 10 mM β-glycerophosphate, 50 mM Sodium fluoride, 1% NP-40 and protease inhibitors) and washed twice with high salt (300 mM NaCl) lysis buffer and then with reaction buffer (50 mM Hepes pH 7.4, 1 mM EGTA, 10 mM dithiothreitol (DTT) and 150 mM NaCl). Substrate vesicles were incubated in the reaction buffer with PTEN immune complexes or with 500 ng of recombinant PTEN protein. After 1 hour of incubation at 37°C, the reactions were stopped through the addition of 10 μl of Bovine Serum Albumin (essentially fatty acid free- Roche) (10 mg/ml) and 500 μl of 1M ice cold perchloric acid (PCA). The samples were mixed and incubated for 30 minutes on ice, followed by centrifugation at 14,000 rpm for 10 minutes at 4°C to remove lipid and protein. 10% (w/v) ammonium molybdate was added to the supernatant to allow the inorganic phosphate to partition into the organic phase. After incubation of 10 minutes at room temperature, 1 ml Toluene:Isobutyl alcohol (1:1 v/v) was added. A two-phase mix was formed, and the upper organic phase, containing the phosphate complex, was then removed, mixed to liquid scintillation cocktail (Scint Safe 3, Fisher Chemical) and radioactivity was counted using a Beckman scintillation counter.



### **Reverse Transcriptase quantitative PCR (qPCR)**

Total cellular RNA was isolated from U87MG cells expressing PTEN WT and mutants by using TRIzol (Life Technologies - Invitrogen) and RNeasy Mini kit (Qiagen), reversed transcribed into random primed cDNA (RNA to cDNA EcoDry Premix – Random Hexamers Clontech) and used as a template in quantitative PCR reactions to measure PTEN mRNA levels. GAPDH was used as internal control and Power Sybr green as the fluorescent reporter (Applied Biosystems). All reactions were performed according to the manufacturer's instructions on a Step One Plus real time PCR instrument (Life Technologies).

Primers were designed to be able to measure PTEN mRNA levels only and not its pseudogene. PTEN Primers: F: 5'-CCCGGGGGGGATCCACTAG; R: 5'-GGATAAATATAGGTCAAG. GAPDH Primers: F: 5'-GTGAAGGTCGGAGTCAACGG; R: 5'-GAGGGATCTCGCTCCTGGAA.

### **Immunocytochemistry**

Neuronal cultures treated as described above were fixed using 4% paraformaldehyde for 30 minutes and then blocked with 3% BSA and 0.1% Triton x100 for 1 hour. Fixed neurons were incubated with anti-GFP antibody (1:1,000, Abcam), anti-PTEN antibody (1:500, PTEN138G6 Cell Signaling Technology) or anti-RFP (1:1,000, Cat. n. ab62341 Abcam) antibody diluted in 3% BSA, 1% goat serum and 1% sodium azide followed by incubation with Alexa488, Alexa568 and Alexa647 conjugated secondary antibodies (1:1,000, Invitrogen). Cells were stained with DAPI (1 µg/ml) for 10 minutes prior to mounting. The soma of the neurons, density and length of the spines were measured using ImageJ and were represented in µm.

## **Animal procedures**

All animal procedures (breeding and sacrifice) were conducted in accordance with local ethical guidelines and approved animal care protocols (Berlin: Institutional Animal Care and Use Committee (IACUC) and the Landesamt für Gesundheit und Soziales (LAGeSO) – license T 0347/11).

## Supplemental References

1. Hobert JA, Embacher R, Mester JL, et al. Biochemical screening and PTEN mutation analysis in individuals with autism spectrum disorders and macrocephaly. *European journal of human genetics : EJHG* 2014;**22**(2):273-6 doi: 10.1038/ejhg.2013.114[published Online First: Epub Date]].
2. Vanderver A, Tonduti D, Kahn I, et al. Characteristic brain magnetic resonance imaging pattern in patients with macrocephaly and PTEN mutations. *American journal of medical genetics Part A* 2014;**164A**(3):627-33 doi: 10.1002/ajmg.a.36309[published Online First: Epub Date]].
3. Bubien V, Bonnet F, Brouste V, et al. High cumulative risks of cancer in patients with PTEN hamartoma tumour syndrome. *J Med Genet* 2013;**50**(4):255-63 doi: 10.1136/jmedgenet-2012-101339[published Online First: Epub Date]].
4. Frazier TW, Embacher R, Tilot AK, et al. Molecular and phenotypic abnormalities in individuals with germline heterozygous PTEN mutations and autism. *Molecular psychiatry* 2014 doi: 10.1038/mp.2014.125[published Online First: Epub Date]].
5. Nagy R, Ganapathi S, Comeras I, et al. Frequency of germline PTEN mutations in differentiated thyroid cancer. *Thyroid* 2011;**21**(5):505-10 doi: 10.1089/thy.2010.0365[published Online First: Epub Date]].
6. Ngeow J, Stanuch K, Mester JL, et al. Second malignant neoplasms in patients with Cowden syndrome with underlying germline PTEN mutations. *Journal of clinical oncology : official journal of the American Society of Clinical Oncology* 2014;**32**(17):1818-24 doi: 10.1200/JCO.2013.53.6656[published Online First: Epub Date]].
7. Buxbaum JD, Cai G, Chaste P, et al. Mutation screening of the PTEN gene in patients with autism spectrum disorders and macrocephaly. *Am J Med Genet B Neuropsychiatr Genet* 2007;**144B**(4):484-91 doi: 10.1002/ajmg.b.30493[published Online First: Epub Date]].
8. Celebi JT, Tsou HC, Chen FF, et al. Phenotypic findings of Cowden syndrome and Bannayan-Zonana syndrome in a family associated with a single germline mutation in PTEN. *J Med Genet* 1999;**36**(5):360-4
9. Mester J, Eng C. Estimate of de novo mutation frequency in probands with PTEN hamartoma tumor syndrome. *Genetics in medicine : official journal of the American College of Medical Genetics* 2012;**14**(9):819-22 doi: 10.1038/gim.2012.51[published Online First: Epub Date]].
10. Marsh DJ, Kum JB, Lunetta KL, et al. PTEN mutation spectrum and genotype-phenotype correlations in Bannayan-Riley-Ruvalcaba syndrome suggest a single entity with Cowden syndrome. *Human molecular genetics* 1999;**8**(8):1461-72
11. Olschwang S, Serova-Sinilnikova OM, Lenoir GM, et al. PTEN germ-line mutations in juvenile polyposis coli. *Nat Genet* 1998;**18**(1):12-4 doi: 10.1038/ng0198-12[published Online First: Epub Date]].
12. Zhou X, Hampel H, Thiele H, et al. Association of germline mutation in the PTEN tumour suppressor gene and Proteus and Proteus-like syndromes. *Lancet* 2001;**358**(9277):210-1
13. Celebi JT, Ping XL, Zhang H, et al. Germline PTEN mutations in three families with Cowden syndrome. *Exp Dermatol* 2000;**9**(2):152-6
14. Klein S, Sharifi-Hannauer P, Martinez-Agosto JA. Macrocephaly as a clinical indicator of genetic subtypes in autism. *Autism research : official journal of the International Society for Autism Research* 2013;**6**(1):51-6 doi: 10.1002/aur.1266[published Online First: Epub Date]].
15. Tate G, Suzuki T, Endo Y, et al. A novel mutation of the PTEN gene in a Japanese patient with Cowden syndrome and bilateral breast cancer. *Cancer Genet Cytogenet* 2008;**184**(1):67-71 doi: 10.1016/j.cancergencyto.2008.03.013[published Online First: Epub Date]].
16. Varga EA, Pastore M, Prior T, et al. The prevalence of PTEN mutations in a clinical pediatric cohort with autism spectrum disorders, developmental delay, and macrocephaly. *Genetics in*

- medicine : official journal of the American College of Medical Genetics 2009;**11**(2):111-7 doi: 10.1097/GIM.0b013e31818fd762[published Online First: Epub Date]].
17. Vega A, Torres J, Torres M, et al. A novel loss-of-function mutation (N48K) in the PTEN gene in a Spanish patient with Cowden disease. *J Invest Dermatol* 2003;**121**(6):1356-9 doi: 10.1111/j.1523-1747.2003.12638.x[published Online First: Epub Date]].
  18. Reardon W, Zhou XP, Eng C. A novel germline mutation of the PTEN gene in a patient with macrocephaly, ventricular dilatation, and features of VATER association. *J Med Genet* 2001;**38**(12):820-3
  19. Loffeld A, McLellan NJ, Cole T, et al. Epidermal naevus in Proteus syndrome showing loss of heterozygosity for an inherited PTEN mutation. *Br J Dermatol* 2006;**154**(6):1194-8 doi: 10.1111/j.1365-2133.2006.07196.x[published Online First: Epub Date]].
  20. Marsh DJ, Dahia PL, Caron S, et al. Germline PTEN mutations in Cowden syndrome-like families. *J Med Genet* 1998;**35**(11):881-5
  21. Lobo GP, Waite KA, Planchon SM, et al. Germline and somatic cancer-associated mutations in the ATP-binding motifs of PTEN influence its subcellular localization and tumor suppressive function. *Human molecular genetics* 2009;**18**(15):2851-62 doi: 10.1093/hmg/ddp220[published Online First: Epub Date]].
  22. Schaaf CP, Sabo A, Sakai Y, et al. Oligogenic heterozygosity in individuals with high-functioning autism spectrum disorders. *Human molecular genetics* 2011;**20**(17):3366-75 doi: 10.1093/hmg/ddr243[published Online First: Epub Date]].
  23. Figer A, Kaplan A, Frydman M, et al. Germline mutations in the PTEN gene in Israeli patients with Bannayan-Riley-Ruvalcaba syndrome and women with familial breast cancer. *Clinical genetics* 2002;**62**(4):298-302
  24. Kohno T, Takahashi M, Fukutomi T, et al. Germline mutations of the PTEN/MMAC1 gene in Japanese patients with Cowden disease. *Jpn J Cancer Res* 1998;**89**(5):471-4
  25. Butler MG, Dasouki MJ, Zhou XP, et al. Subset of individuals with autism spectrum disorders and extreme macrocephaly associated with germline PTEN tumour suppressor gene mutations. *J Med Genet* 2005;**42**(4):318-21 doi: 10.1136/jmg.2004.024646[published Online First: Epub Date]].
  26. Bussaglia E, Pujol RM, Gil MJ, et al. PTEN mutations in eight Spanish families and one Brazilian family with Cowden syndrome. *J Invest Dermatol* 2002;**118**(4):639-44 doi: 10.1046/j.1523-1747.2002.01728.x[published Online First: Epub Date]].
  27. Busch RM, Chapin JS, Mester J, et al. Cognitive characteristics of PTEN hamartoma tumor syndromes. *Genetics in medicine : official journal of the American College of Medical Genetics* 2013;**15**(7):548-53 doi: 10.1038/gim.2013.1[published Online First: Epub Date]].
  28. Tan WH, Baris HN, Burrows PE, et al. The spectrum of vascular anomalies in patients with PTEN mutations: implications for diagnosis and management. *J Med Genet* 2007;**44**(9):594-602 doi: 10.1136/jmg.2007.048934[published Online First: Epub Date]].
  29. Ngeow J, Heald B, Rybicki LA, et al. Prevalence of germline PTEN, BMPR1A, SMAD4, STK11, and ENG mutations in patients with moderate-load colorectal polyps. *Gastroenterology* 2013;**144**(7):1402-9, 09 e1-5 doi: 10.1053/j.gastro.2013.02.001[published Online First: Epub Date]].
  30. Tsou HC, Ping XL, Xie XX, et al. The genetic basis of Cowden's syndrome: three novel mutations in PTEN/MMAC1/TEP1. *Hum Genet* 1998;**102**(4):467-73
  31. Orrico A, Galli L, Buoni S, et al. Novel PTEN mutations in neurodevelopmental disorders and macrocephaly. *Clinical genetics* 2009;**75**(2):195-8 doi: 10.1111/j.1399-0004.2008.01074.x[published Online First: Epub Date]].
  32. De Vivo I, Gertig DM, Nagase S, et al. Novel germline mutations in the PTEN tumour suppressor gene found in women with multiple cancers. *J Med Genet* 2000;**37**(5):336-41
  33. McBride KL, Varga EA, Pastore MT, et al. Confirmation study of PTEN mutations among individuals with autism or developmental delays/mental retardation and macrocephaly.

Autism research : official journal of the International Society for Autism Research  
2010;**3**(3):137-41 doi: 10.1002/aur.132[published Online First: Epub Date]].

34. Kersseboom R, Dubbink HJ, Corver WE, et al. PTEN in colorectal cancer: a report on two Cowden syndrome patients. *Clinical genetics* 2012;**81**(6):555-62 doi: 10.1111/j.1399-0004.2011.01639.x[published Online First: Epub Date]].
35. Nelen MR, van Staveren WC, Peeters EA, et al. Germline mutations in the PTEN/MMAC1 gene in patients with Cowden disease. *Human molecular genetics* 1997;**6**(8):1383-7
36. Elia M, Amato C, Bottitta M, et al. An atypical patient with Cowden syndrome and PTEN gene mutation presenting with cortical malformation and focal epilepsy. *Brain Dev* 2012;**34**(10):873-6 doi: 10.1016/j.braindev.2012.03.005[published Online First: Epub Date]].
37. Liaw D, Marsh DJ, Li J, et al. Germline mutations of the PTEN gene in Cowden disease, an inherited breast and thyroid cancer syndrome. *Nature Genetics* 1997;**16**(1):64-67
38. Kurose K, Araki T, Matsunaka T, et al. Variant manifestation of Cowden disease in Japan: hamartomatous polyposis of the digestive tract with mutation of the PTEN gene. *Am J Hum Genet* 1999;**64**(1):308-10 doi: 10.1086/302207[published Online First: Epub Date]].
39. Heindl M, Handel N, Ngeow J, et al. Autoimmunity, intestinal lymphoid hyperplasia, and defects in mucosal B-cell homeostasis in patients with PTEN hamartoma tumor syndrome. *Gastroenterology* 2012;**142**(5):1093-96 e6 doi: 10.1053/j.gastro.2012.01.011[published Online First: Epub Date]].
40. O'Roak BJ, Vives L, Fu W, et al. Multiplex targeted sequencing identifies recurrently mutated genes in autism spectrum disorders. *Science* 2012;**338**(6114):1619-22 doi: 10.1126/science.1227764[published Online First: Epub Date]].
41. Derrey S, Proust F, Debono B, et al. Association between Cowden syndrome and Lhermitte-Duclos disease: report of two cases and review of the literature. *Surg Neurol* 2004;**61**(5):447-54; discussion 54 doi: 10.1016/S0090-3019(03)00576-7[published Online First: Epub Date]].
42. Tekin M, Hisimi BO, Fitoz S, et al. A germline PTEN mutation with manifestations of prenatal onset and verrucous epidermal nevus. *American journal of medical genetics Part A* 2006;**140**(13):1472-5 doi: 10.1002/ajmg.a.31273[published Online First: Epub Date]].
43. Busa T, Chabrol B, Perret O, et al. Novel PTEN germline mutation in a family with mild phenotype: difficulties in genetic counseling. *Gene* 2013;**512**(2):194-7 doi: 10.1016/j.gene.2012.09.134[published Online First: Epub Date]].
44. Boccone L, Dessi V, Zappu A, et al. Bannayan-Riley-Ruvalcaba syndrome with reactive nodular lymphoid hyperplasia and autism and a PTEN mutation. *American journal of medical genetics Part A* 2006;**140**(18):1965-9 doi: 10.1002/ajmg.a.31396[published Online First: Epub Date]].
45. Kubo Y, Urano Y, Hida Y, et al. A novel PTEN mutation in a Japanese patient with Cowden disease. *Br J Dermatol* 2000;**142**(6):1100-5
46. Gicquel JJ, Vabres P, Bonneau D, et al. Retinal angioma in a patient with Cowden disease. *Am J Ophthalmol* 2003;**135**(3):400-2
47. Nelen MR, Kremer H, Konings IB, et al. Novel PTEN mutations in patients with Cowden disease: absence of clear genotype-phenotype correlations. *European journal of human genetics : EJHG* 1999;**7**(3):267-73 doi: 10.1038/sj.ejhg.5200289[published Online First: Epub Date]].
48. Banneau G, Guedj M, MacGrogan G, et al. Molecular apocrine differentiation is a common feature of breast cancer in patients with germline PTEN mutations. *Breast cancer research : BCR* 2010;**12**(4):R63 doi: 10.1186/bcr2626[published Online First: Epub Date]].
49. Marsh DJ, Dahia PL, Zheng Z, et al. Germline mutations in PTEN are present in Bannayan-Zonana syndrome [letter]. *Nat Genet* 1997;**16**(4):333-4
50. Lachlan KL, Lucassen AM, Bunyan D, et al. Cowden syndrome and Bannayan Riley Ruvalcaba syndrome represent one condition with variable expression and age-related penetrance: results of a clinical study of PTEN mutation carriers. *J Med Genet* 2007;**44**(9):579-85 doi: 10.1136/jmg.2007.049981[published Online First: Epub Date]].

51. Kirches E, Steiner J, Schneider T, et al. Lhermitte-Duclos disease caused by a novel germline PTEN mutation R173P in a patient presenting with psychosis. *Neuropathol Appl Neurobiol* 2010;**36**(1):86-9 doi: 10.1111/j.1365-2990.2009.01041.x[published Online First: Epub Date]].
52. Thiffault I, Schwartz CE, Der Kaloustian V, et al. Mutation analysis of the tumor suppressor PTEN and the glypican 3 (GPC3) gene in patients diagnosed with Proteus syndrome. *American journal of medical genetics Part A* 2004;**130A**(2):123-7 doi: 10.1002/ajmg.a.30335[published Online First: Epub Date]].
53. Kim DK, Myung SJ, Yang SK, et al. Analysis of PTEN gene mutations in Korean patients with Cowden syndrome and polyposis syndrome. *Dis Colon Rectum* 2005;**48**(9):1714-22 doi: 10.1007/s10350-005-0130-9[published Online First: Epub Date]].
54. Staal FJ, van der Luijt RB, Baert MR, et al. A novel germline mutation of PTEN associated with brain tumours of multiple lineages. *Br J Cancer* 2002;**86**(10):1586-91 doi: 10.1038/sj.bjc.6600206[published Online First: Epub Date]].
55. Chi SG, Kim HJ, Park BJ, et al. Mutational abrogation of the PTEN/MMAC1 gene in gastrointestinal polyps in patients with Cowden disease. *Gastroenterology* 1998;**115**(5):1084-9
56. Sawada T, Hamano N, Satoh H, et al. Mutation analysis of the PTEN / MMAC1 gene in Japanese patients with Cowden disease. *Jpn J Cancer Res* 2000;**91**(7):700-5
57. Lynch ED, Ostermeyer EA, Lee MK, et al. Inherited mutations in PTEN that are associated with breast cancer, cowden disease, and juvenile polyposis. *Am J Hum Genet* 1997;**61**(6):1254-60 doi: 10.1086/301639[published Online First: Epub Date]].
58. Davidson L, Maccario H, Perera NM, et al. Suppression of cellular proliferation and invasion by the concerted lipid and protein phosphatase activities of PTEN. *Oncogene* 2010;**29**(5):687-97 doi: onc2009384 [pii] 10.1038/onc.2009.384[published Online First: Epub Date]].
59. McConnachie G, Pass I, Walker SM, et al. Interfacial kinetic analysis of the tumour suppressor phosphatase, PTEN: evidence for activation by anionic phospholipids. *Biochem J* 2003;**371**(Pt 3):947-55
